# Supplementary material for: Development of effective potassium acetate extractant
Source: Royal Society of Chemistry journal article supplement (doi:10.1039/d1ra00859e), 2021-01-01
Supplement: d1ra00859e1.pdf [file d1ra00859e1.pdf]

## Supporting Information

### Development of effective potassium acetate extractant

Maciej Zakrzewski, Dominika Załubiniak and Piotr Piątek\*

*\*The Faculty of Chemistry, The University of Warsaw, Pasteura 1, 02-093  
Warsaw, Poland*

#### Table of Contents:

1. Structures of similar compounds
2. Synthetic route to receptors **1** and **2** with experimental procedures and NMR spectra
3. UV-Vis titration experiments
4. NMR titration experiments
5. NMR extraction experiments
6. Extraction of potassium ibuprofenate
7. 2D NMR ROESY experiment
8. The calculated structure of **1**•AcOK complex
9. References

#### General Information

All solvents and starting materials were purchased from Merc or Fluorochem. All commercial-grade chemicals were used without further purification. The TBA AcO salt and cation  $\text{ClO}_4^-$  or  $\text{PF}_6^-$  salts were dried under high vacuum at 30–45 °C before using.  $^1\text{H}$  and  $^{13}\text{C}$  NMR spectra as well as titration experiments were performed on a 300 MHz Bruker Avance spectrometer.  $^1\text{H}$  NMR chemical shifts  $\delta$  are reported in ppm with reference to the tetramethylsilane ( $\text{CDCl}_3$ ) or protonated residual solvent signal ( $\text{CD}_3\text{CN}$ ). (3-Nitrobenzyl)-aza-18-crown-6 and (3-aminobenzyl)-aza-18-crown-6 were prepared according to our literature report.<sup>1</sup>

#### 1. Structures of similar compounds

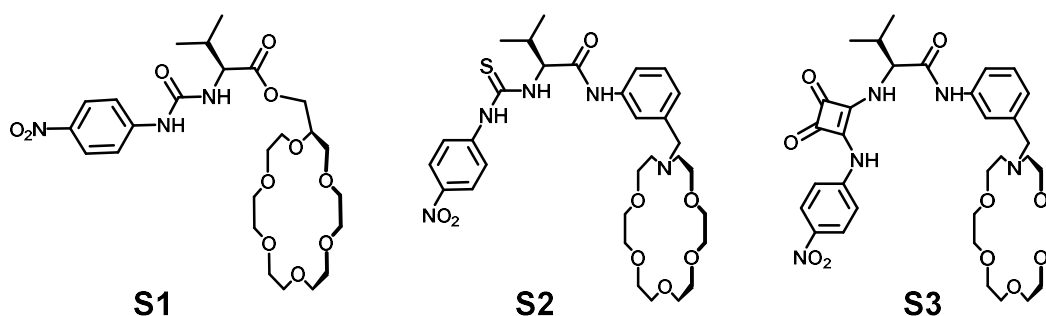

## 2. Synthetic route to the receptors 1 and 2 with experimental procedures and NMR spectra

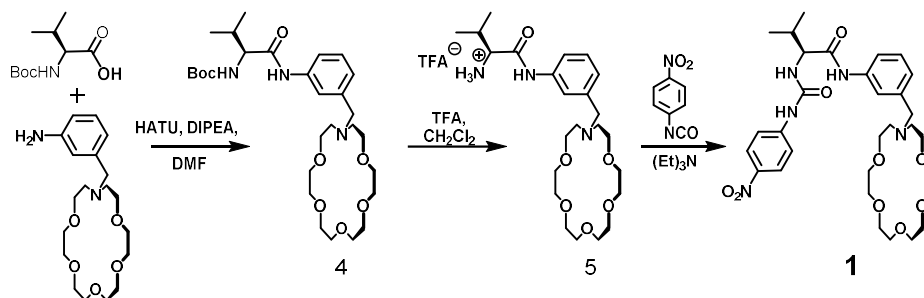

### (3-aminobenzyl)-aza-18-crown-6 amide of N-Boc-L-valine

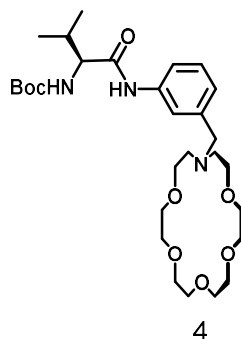

The solution of N-Boc-L-valine 0.23 g (1.06 mmol), 0.40g (1.06 mmol) HATU, 1.40 g (1.8 mL, 1.1 mmol) DIPEA, dissolved in 8 mL of dry DMF, was stirred under argon atmosphere at room temperature for 1h. Then 0.32g (0.87 mmol) of (3-aminobenzyl)-aza-18-crown-6 was added. The reaction mixture was then stirred at room temperature overnight. Then the solvent was evaporated. The oily residue was dissolved in chloroform and washed two times with distilled water. The organic phase was dried over  $\text{MgSO}_4$ , filtered and the solvent was evaporated. The oil was purified by column chromatography on silica gel with chloroform then 4% methanol/chloroform as eluents to give 0.35 g (0.62 mmol) of an amorphous solid 77% of yield;  $R_f$  (10% MeOH/DCM) = 0.53  $^1\text{H}$  NMR (300 MHz;  $\text{CDCl}_3$ ;  $\delta$ ppm): 8.77 (s; 1H), 7.97 (s; 1H), 7.41 (s; 1H), 7.33 (t,  $J = 12$  Hz, 1H), 7.17 (d,  $J=6$  Hz, 1H), 5.37 (s, 1H), 4.31 (s, 2H), 4.09 (m, 1H), 3.77-3.60 (m, 20H), 3.33 (s, 4H), 2.14 (m, 1H), 1.41 (s, 9H), 0.98 (m, 6H);  $^{13}\text{C}$  NMR (300 MHz;  $\text{CDCl}_3$ ;  $\delta$ ppm): 171.25; 156.11; 138.97; 130.09; 127.03; 79.94; 77.34; 70.05; 64.03; 60.70; 53.94; 31.50; 28.37; 19.57; 17.84

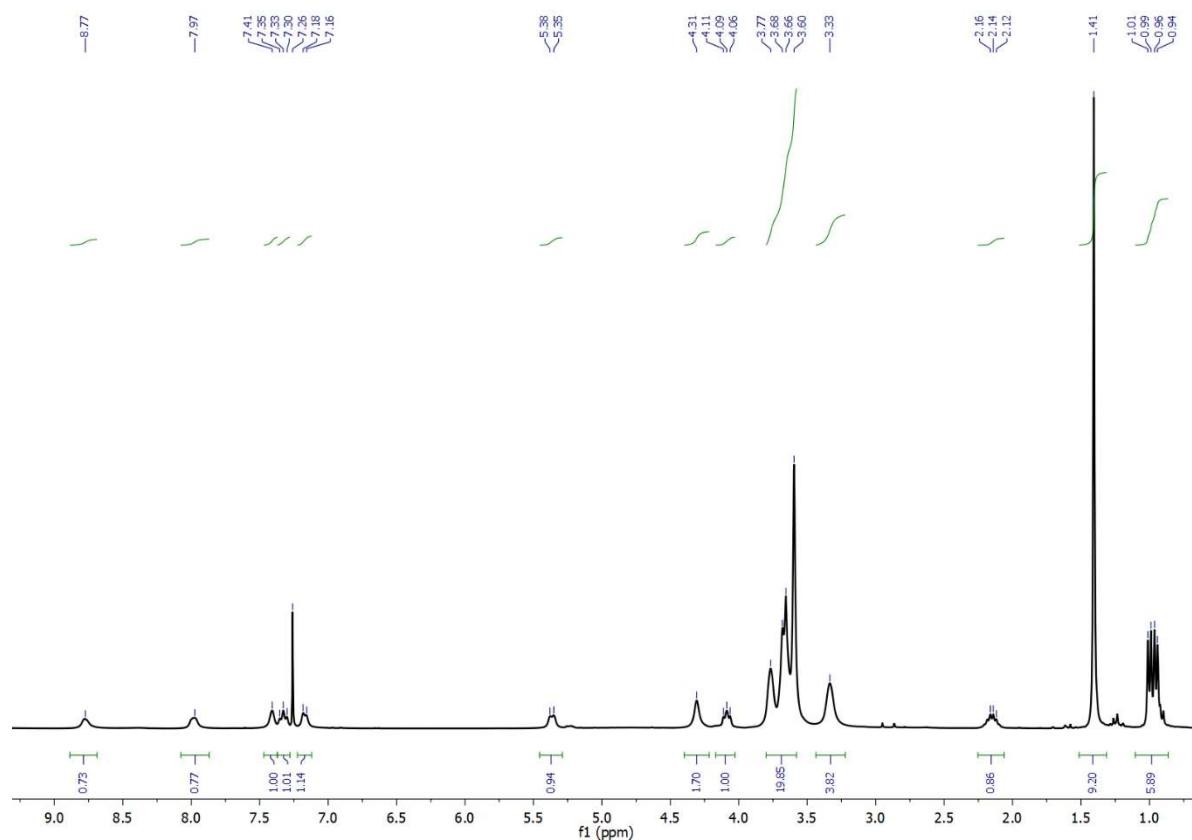

Figure 1.  $^1\text{H}$  NMR of compound **4**

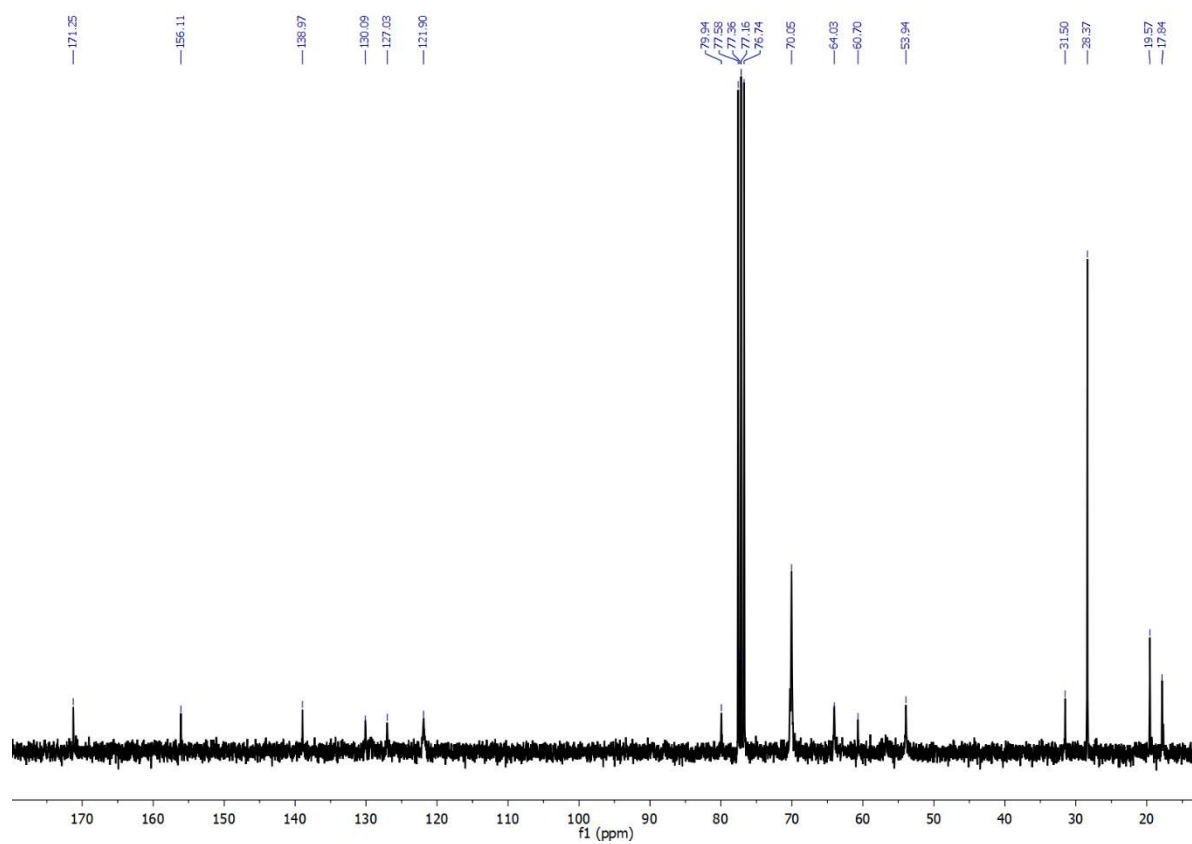

Figure 2.  $^{13}\text{C}$  NMR of compound **4**

### Trifluoroacetic acid salt of (3-aminobenzyl)-aza-18-crown-6 amide of N-Boc-L-valine

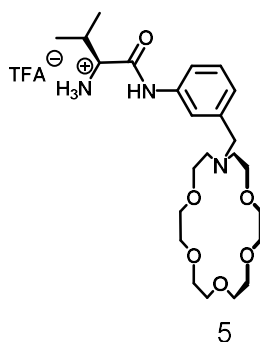

The solution of **4** 0.35 g (0.62 mmol) in 2 mL DCM was cooled to 0 °C using dry ice/water bath. To this solution 1.5 mL of trifluoroacetic acid was added. Then cooling bath was removed and the reaction mixture was stirred at room temperature for 1h. The full conversion of the substrate was confirmed by TLC analysis in 10% MeOH/DCM. Then the volatiles were evaporated and the residue was dried under high vacuum to give desired compound in form of TFA salts. These compounds were used in the next step without further purification.

### Receptor 1

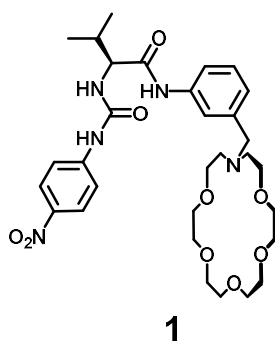

In round bottom flask the 0.35 g (0.6 mmol) of compound **5** and 0.6 mL (0.44 g, 4 mmol) of triethylamine were dissolved in 15 mL of dry THF. To the resulting mixture 0.12 g (0.73 mmol) of 4-nitrophenyl isothiocyanate was added under argon atmosphere. The reaction mixture was stirred overnight at room temperature. Then the solvent was evaporated and the resulting oil was dissolved in chloroform and washed two times with distilled water. The organic phase was dried over  $\text{MgSO}_4$ , filtered and the solvent was evaporated. The receptors were purified by column chromatography on silica gel with 10% MeOH/DCM as eluents to give 0.20 g (0.32 mmol) of an amorphous solid 53% of yield;  $R_f$  (10% MeOH/DCM) = 0.2. To remove any inorganic salts absorbed during the work-up, the receptor **1** was dissolved in chloroform and washed with distilled water. The evaporation of the solvent (without drying) gave desired receptor.  $^1\text{H}$  NMR (300 MHz; DMSO  $\delta$ ppm): 10.16 (s, 1H), 9.46 (s, 1H), 8.14 (d,  $J$ = 9Hz, 2H), 7.60 (d,  $J$ = 9Hz, 2H), 7.54- 7.52 (bs, 2H), 7.23 (t,  $J$ =4 Hz, 1H), 7.01 (d,  $J$ =4 Hz, 1H), 6.74 (d,  $J$ = 9 Hz, 1H), 4.31 (dd,  $J_1$ =9 Hz,  $J_2$ =4 Hz, 1H), 3.59 (s, 2H), 3.54- 3.48 (m, 20H) 2.66 (t,  $J$ =4 Hz, 4H), 2.06 (m, 1H), 0.93 (m, 6H);  $^{13}\text{C}$  NMR (300 MHz;  $\text{CDCl}_3$ ;  $\delta$ ppm): 172.62, 172.52, 155.07, 145.91, 141.70, 141.65, 137.32, 128.74, 124.95, 124.87, 121.74, 117.48, 71.14, 70.80, 70.73, 70.15, 59.46, 55.17, 32.56, 19.77, 18.31; HR-MS (ESI):  $m/z$  = 654.3119  $[\text{M}+\text{Na}]^+$  (calc. for  $\text{C}_{31}\text{H}_{45}\text{N}_5\text{O}_9\text{Na}$ : 654.3109)

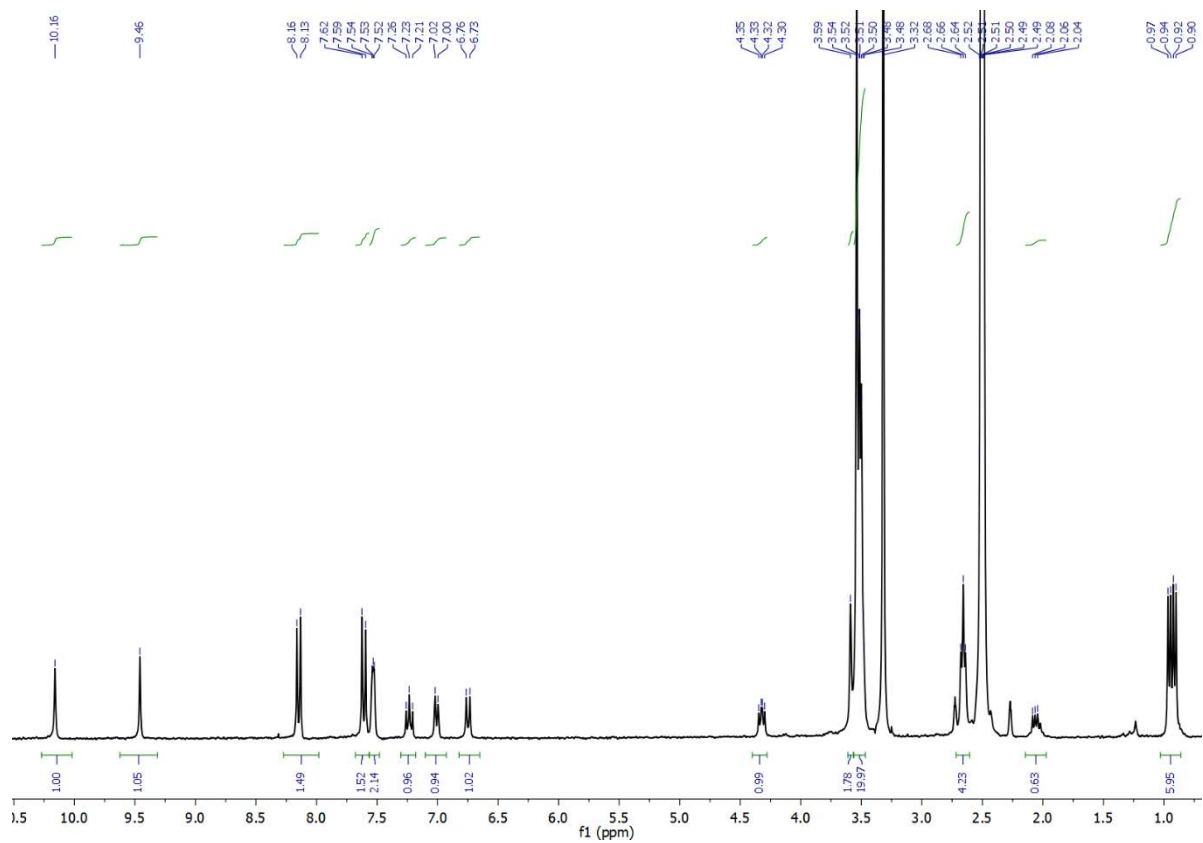

Figure 3. <sup>1</sup>H NMR of compound 1

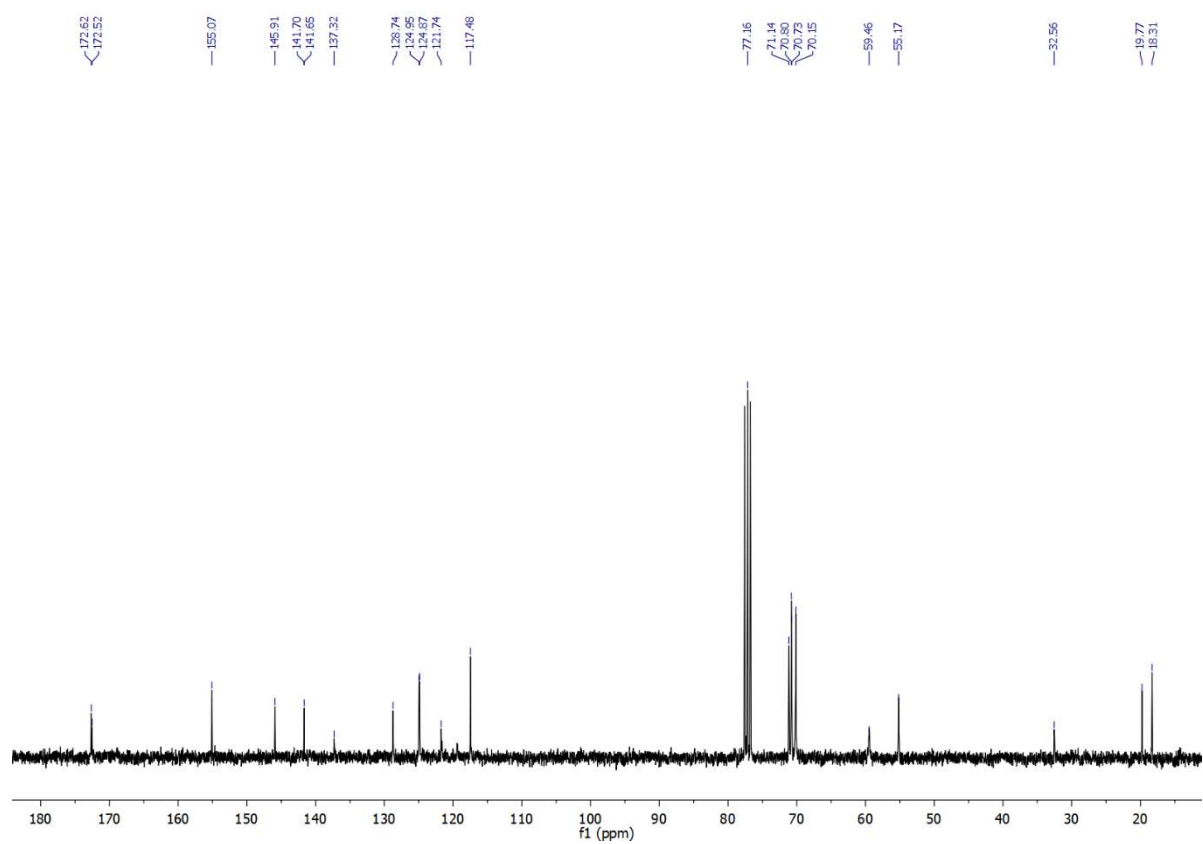

Figure 4. <sup>13</sup>C NMR of compound 1

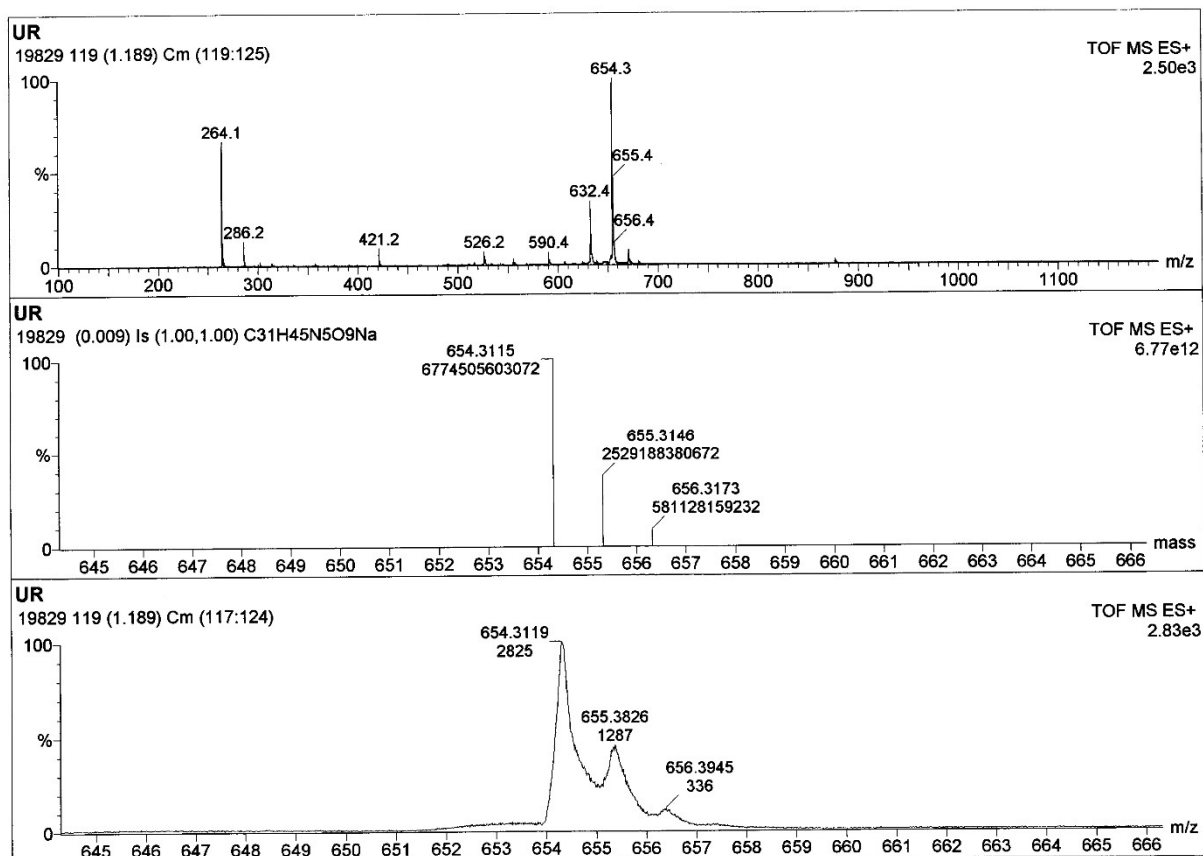

Figure 5. HR-MS of compound 1

Synthetic route of the compound 2 is analogous to the synthetic route of the compound 1 with the same procedures and purification methods.

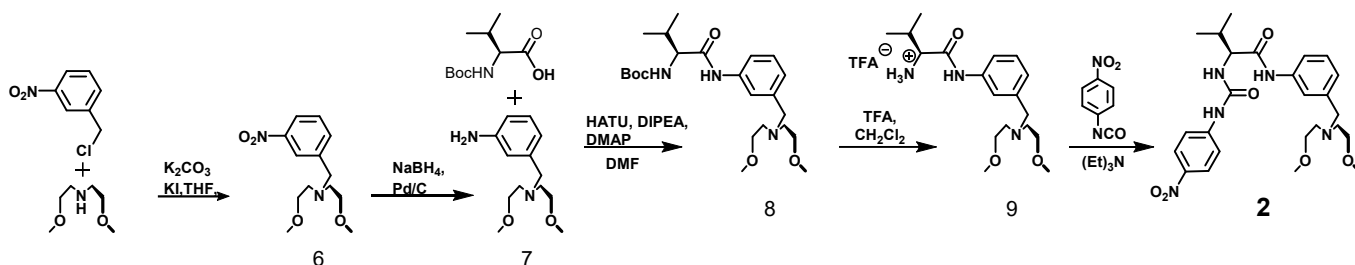

## 2-methoxy-N-(2-methoxyethyl)-N-(3-nitrobenzyl)ethan-1-amine

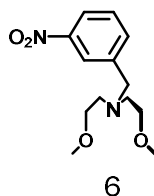

To a solution of 4 g (30 mmol) bis(2-methoxyethyl)amine in 150 mL of anhydrous THF, 12.5g (90 mmol) potassium carbonate, catalytic amount of potassium iodide and 5.7 g (33.3 mmol) 3-nitrobenzyl chloride was added. The reaction mixture was stirred at 66 °C (oil bath) for 72h. Then the solvent was evaporated. The oily residue was dissolved in chloroform and washed two times with distilled water. The organic phase was dried over MgSO<sub>4</sub>, filtered and the solvent was evaporated. The oil was purified by column chromatography on silica gel with

chloroform as eluents to give 4.47g (16.67 mmol) of product **6** as oil in 55% of yield.  $R_f$  (10% MeOH/DCM) = 0.4;  $^1\text{H}$  NMR (300 MHz,  $\text{CDCl}_3$ ,  $\delta_{\text{ppm}}$ ): 8.21 (s, 1H), 8.03 (d,  $J=9$  Hz, 1H), (7.66 (d,  $J=9$  Hz, 1H), 7.43 (m, 1H), 3.80 (s, 2H), 3.45 (t,  $J=6$  Hz, 4H), 3.27 (s, 6H), 2.73 (t,  $J=6$  Hz, 4H);  $^{13}\text{C}$  NMR (75 MHz,  $\text{CDCl}_3$ ,  $\delta_{\text{ppm}}$ ): 148.30, 142.57, 134.69, 128.98, 123.36, 121.88, 71.25, 58.83, 58.76, 53.85.

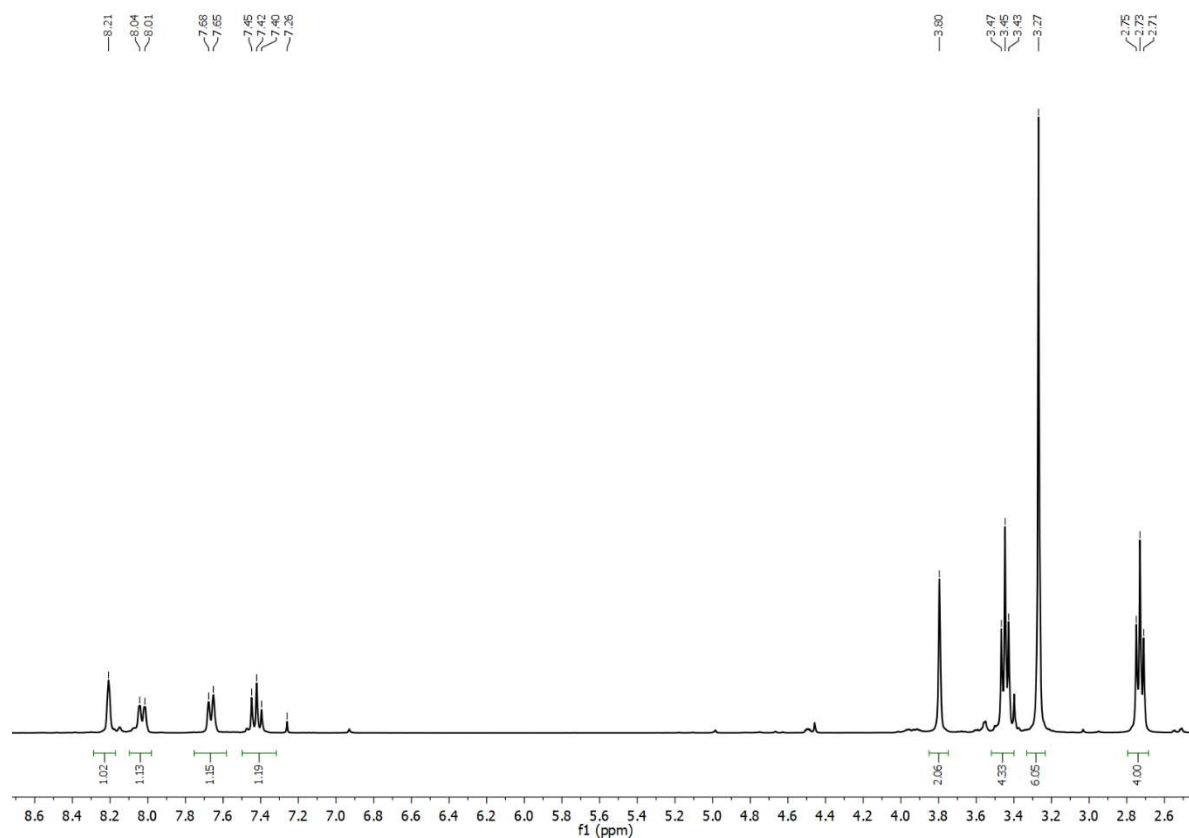

**Figure 6.**  $^1\text{H}$  NMR of compound **6**

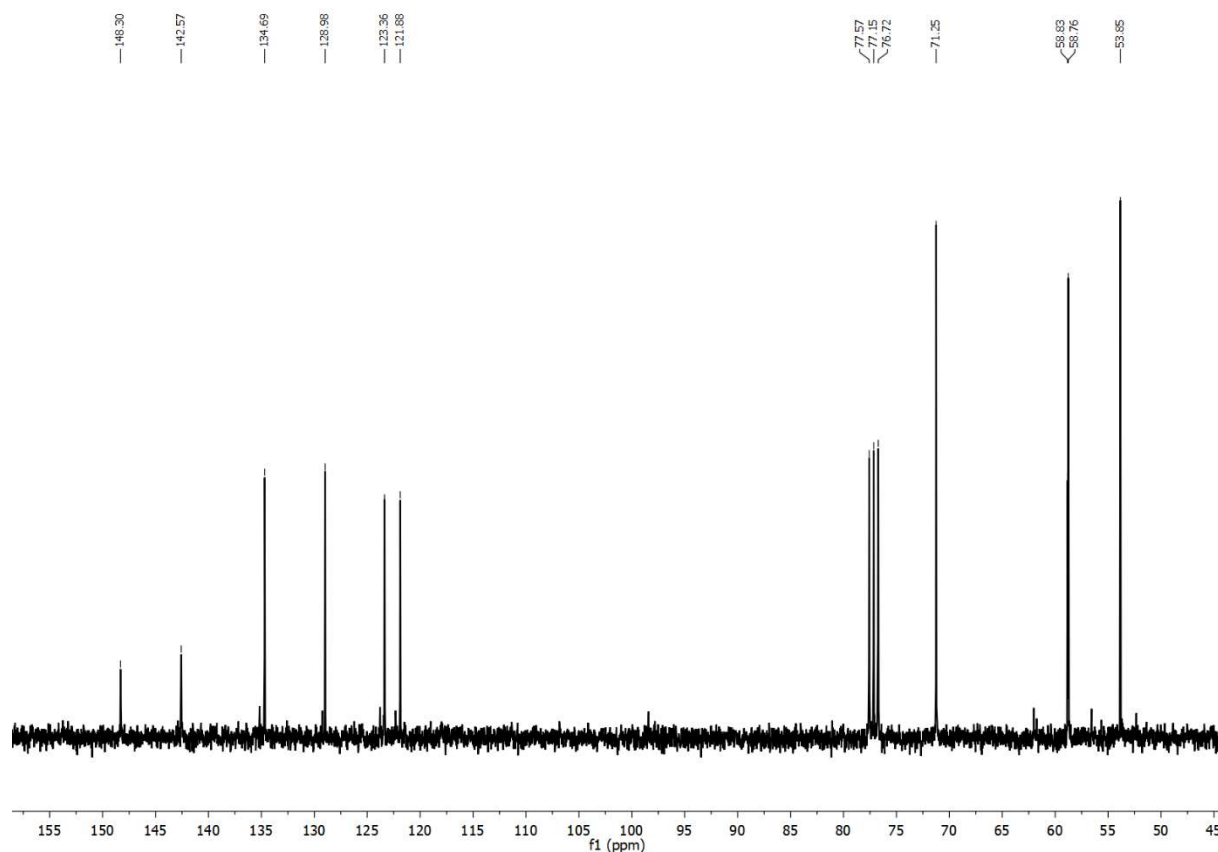

**Figure 7.**  $^{13}\text{C}$  NMR of compound **6**

### 3-((bis(2-methoxyethyl)amino)methyl)aniline

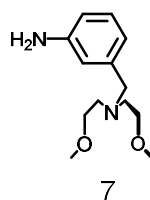

To a solution of **6** (0.45 g, 1.68 mmol) in 4mL of THF and 4 mL of MeOH, 0.5g of 10% palladium on carbon was added under argon atmosphere. Then to vigorously stirred reaction mixture 0.14 g (3.7 mmol) of sodium borohydride was added. The resulting mixture was stirred at room temperature for one hour. Then the catalyst was removed by filtration through a pad of Celit and the solvents were evaporated. The oily residue was dissolved in chloroform and washed two times with distilled water. The organic phase was dried over  $\text{MgSO}_4$ , filtered and the solvent was evaporated to give 0.4 g (1.67 mmol) of **7** as colourless oil 99% of yield. This compound was used in the next step without further purification.

### N-(3-((bis(2-methoxyethyl)amino)methyl)phenyl)amide of N-Boc-L-valine

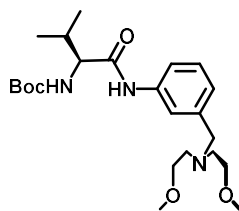

8

The solution of N-Boc-L-valine 0.4 g (1.84 mmol), 0.7g (1.84 mmol) HATU, 2.5g (3.2mL, 2.0 mmol) triethylamine, dissolved in 8 mL of dry DMF, was stirred under argon atmosphere at room temperature for 1h. Then 0.4g (1.7mmol) of **7** was added. The reaction mixture was then stirred at room temperature overnight. Then the solvent was evaporated. The oily residue was dissolved in chloroform and washed two times with distilled water. The organic phase was dried over  $\text{MgSO}_4$ , filtered and the solvent was evaporated. The oil was purified by column chromatography on silica gel with chloroform then 4% methanol/chloroform as eluents to give 0.51 g (1.17 mmol) of an amorphous solid 68% of yield;  $R_f$  (10% MeOH/DCM) = 0.55;  $^1\text{H}$  NMR (300 MHz;  $\text{CD}_3\text{CN}$ ;  $\delta$ ppm): 8.70 (s, 1H), 7.52 (s, 1H), 7.46 (d,  $J=9\text{Hz}$ , 1H), 7.22 (t,  $J=9\text{Hz}$ , 1H), 7.05 (d,  $J=9\text{Hz}$ , 1H), 5.80 (bs, 1H), 4.03 (m, 1H), 3.60 (s, 2H), 3.41 (t,  $J=6\text{Hz}$ , 4H), 3.24 (s, 6H), 2.64 (t,  $J=6\text{Hz}$ , 4H), 1.41 (s, 9H), 0.97 (m, 6H);  $^{13}\text{C}$  NMR (300 MHz;  $\text{CD}_3\text{CN}$ ;  $\delta$ ppm): 171.76, 157.01, 142.09, 139.22, 129.47, 125.32, 120.96, 119.24, 79.90, 71.92, 61.71, 60.17, 58.82, 54.50, 31.86, 28.62, 19.79, 18.54.

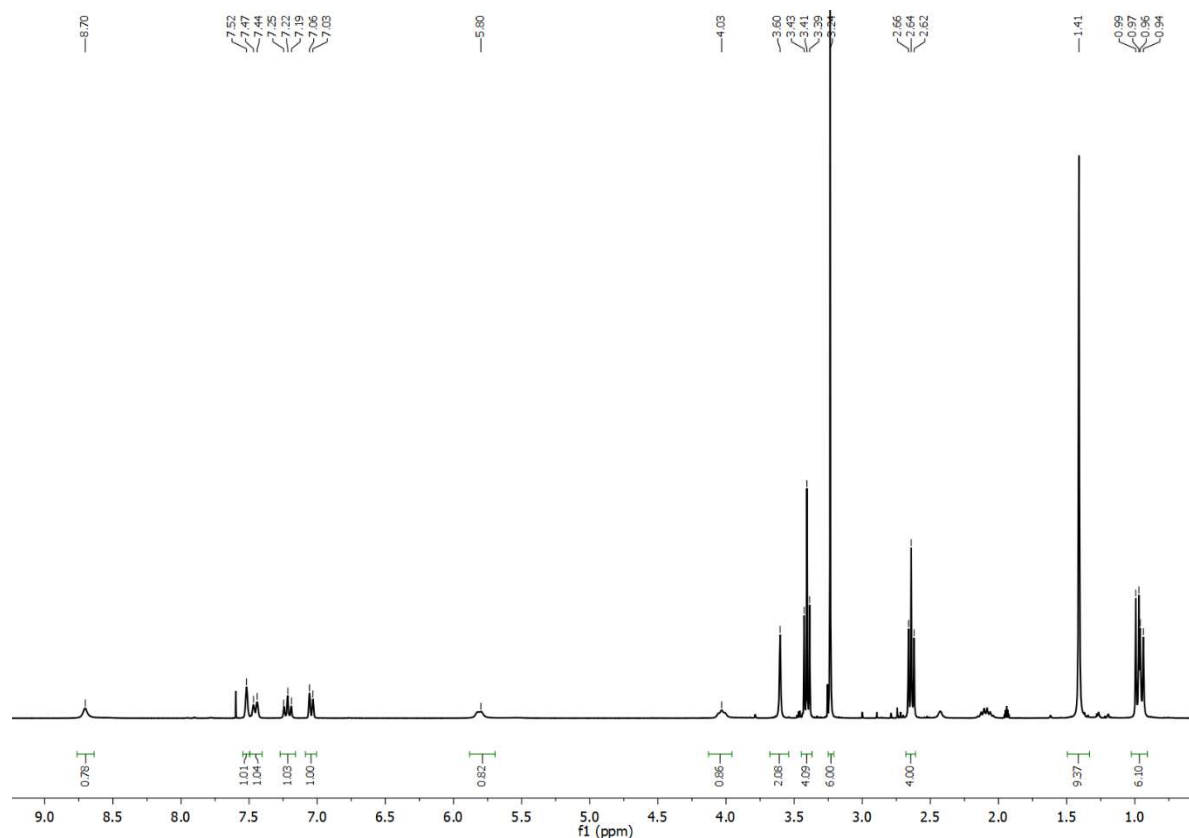

**Figure 8.**  $^1\text{H}$  NMR of compound **8**

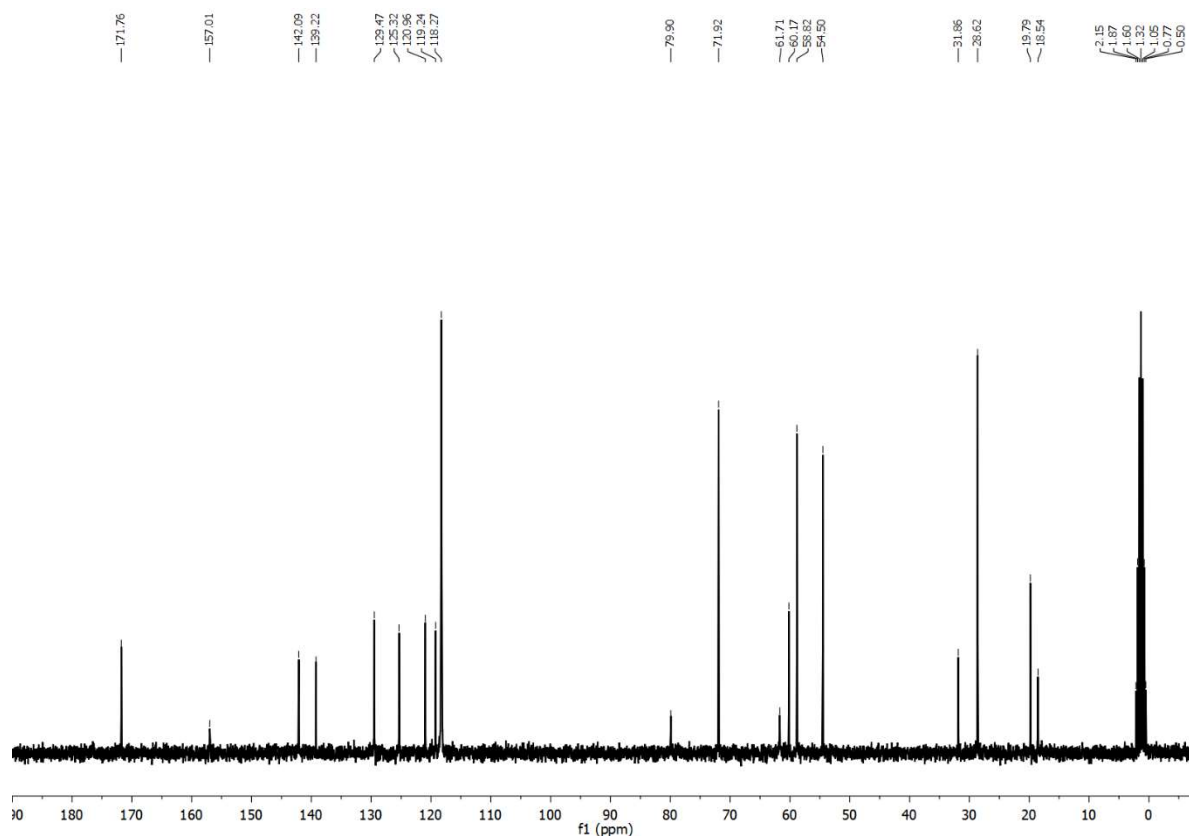

**Figure 9.**  $^{13}\text{C}$  NMR of compound **8**

#### Trifluoroacetic acid salt of (3-aminobenzyl)-aza—bis-2-methoxyethyl amide of N-Boc-L-valine

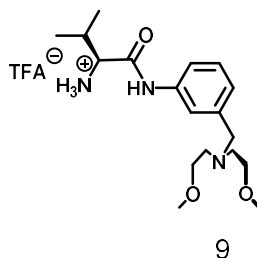

The solution of **8** 0.51 g (1.17 mmol) in 4mL DCM was cooled to 0 °C using dry ice/water bath. To this solution 3.0 mL of trifluoroacetic acid was added. Then cooling bath was removed and the reaction mixture was stirred at room temperature for 1h. The full conversion of the substrate was confirmed by TLC analysis in 10% MeOH/DCM. Then the volatiles were evaporated and the residue was dried under high vacuum to give the desired compound in form of TFA salts. These compounds were used in the next step without further purification.

#### Monotopic receptor **2**

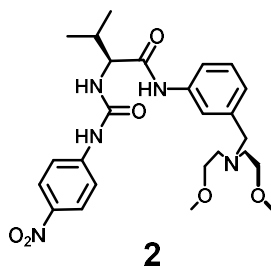

In round bottom flask the 0.51 g (1.17 mmol) of the compound **9** and 2.5 mL (1.83g, 17 mmol) of triethylamine were dissolved in 10 mL of dry THF. To the resulting mixture 0.21 g (1.29 mmol) of 4-nitrophenyl isothiocyanate was added under argon atmosphere. The reaction mixture was stirred overnight at room temperature. Then the solvent was evaporated and the resulting oil was dissolved in chloroform and washed two times with distilled water. The organic phase was dried over  $\text{MgSO}_4$ , filtered and the solvent was evaporated. Receptors were purified by column chromatography on silica gel with 10% MeOH/DCM as eluents to give 0.29 g (0.57 mmol) of an amorphous solid 49% of yield;  $R_f$  (10% MeOH/DCM) = 0.22. To remove any inorganic salts absorbed during the work-up, the receptor **2** was dissolved in chloroform and washed with distilled water. The evaporation of the solvent (without drying) gave the desired receptor.  $^1\text{H}$  NMR (300 MHz;  $\text{CD}_3\text{CN}$ ;  $\delta$ ppm): 8.76 (s, 1H), 8.15 (s, 1H), 8.03 (bt,  $J_1=6\text{Hz}$ ,  $J_2=9\text{Hz}$ , 1H), 7.53 (s, 1H), 7.51 (s, 1H), 7.47 (d,  $J=9\text{Hz}$ , 1H), 7.42 (s, 1H), 7.23 (bt,  $J_1=6\text{Hz}$ ,  $J_2=9\text{Hz}$ , 1H), 7.05 (d,  $J=6\text{Hz}$ , 1H), 6.24 (m, 1H), 4.34 (t,  $J=6\text{Hz}$ , 1H), 3.59 (s, 2H), 3.38 (t,  $J=6\text{Hz}$ , 4H), 3.21 (s, 6H), 2.61 (t,  $J=6\text{Hz}$ , 4H), 2.23-2.14 (m, 1H), 1.05-0.97 (m, 6H);  $^{13}\text{C}$  NMR (300 MHz;  $\text{CDCl}_3$ ;  $\delta$ ppm): 172.04, 155.60, 147.25, 142.66, 142.26, 138.93, 129.58, 125.86, 125.70, 121.35, 119.60, 71.87, 60.49, 60.07, 58.79, 54.47, 32.35, 19.81, 18.20; HR-MS (ESI):  $m/z$  = 524.2485  $[\text{M}+\text{Na}]^+$  (calc. for  $\text{C}_{25}\text{H}_{35}\text{N}_5\text{O}_6\text{Na}$ : 524.2480)

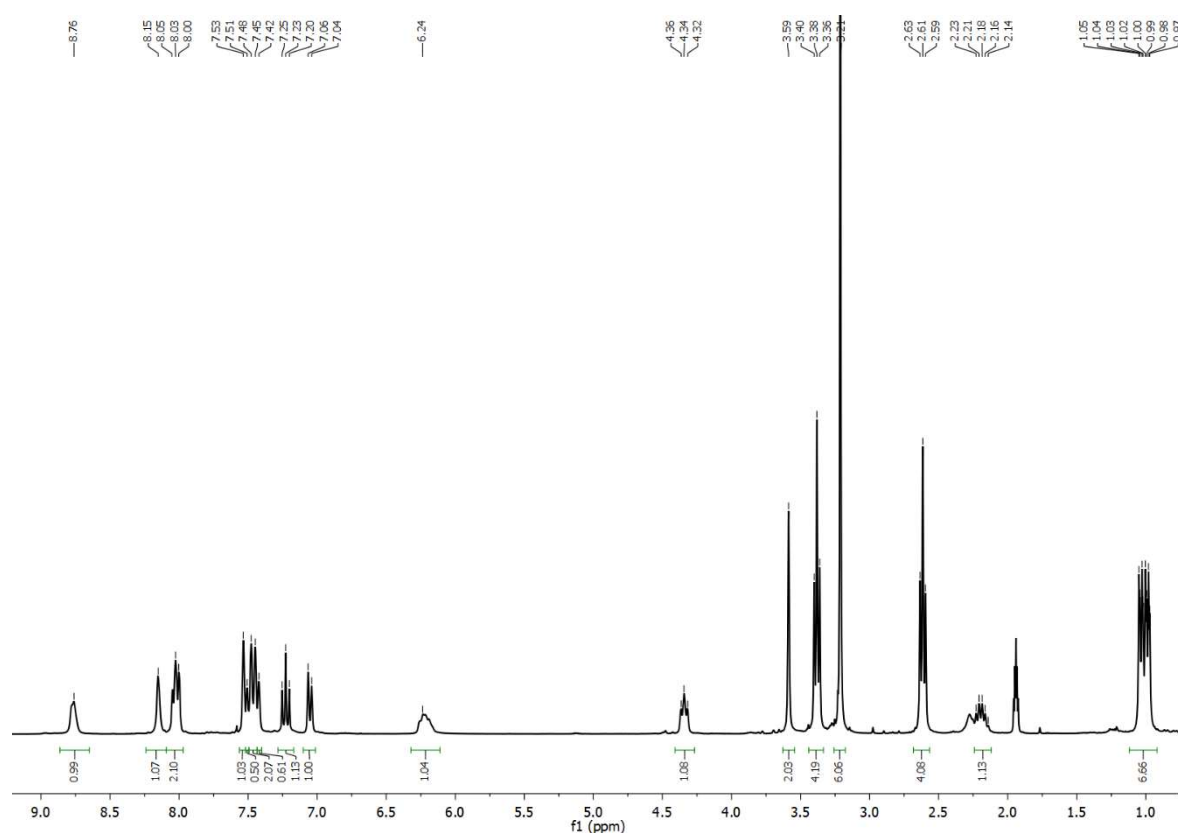

**Figure 10.**  $^1\text{H}$  NMR of compound **2**

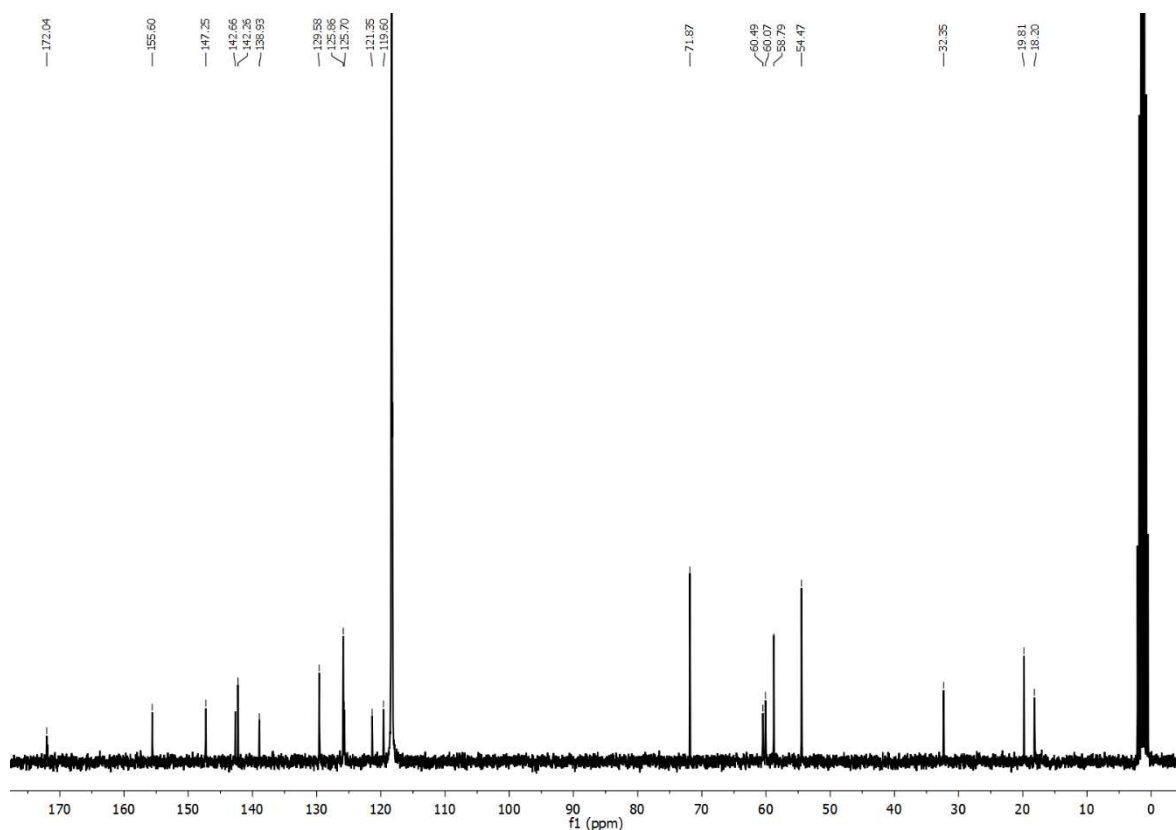

Figure 11.  $^{13}\text{C}$  NMR of compound 2

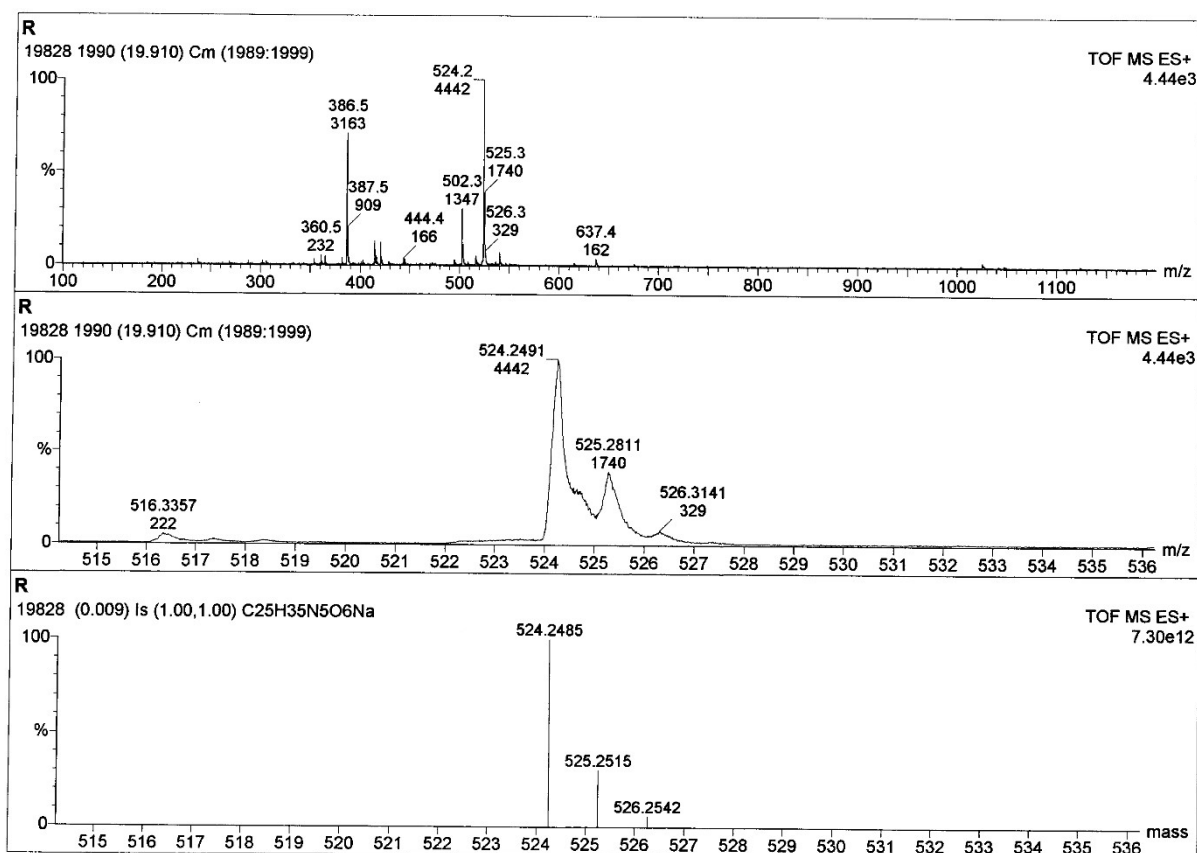

Figure 12. HR-MS of compound 2

### 3. UV-Vis titration experiments

UV-Vis titration experiments were performed on a Thermo Spectronic Unicam UV 500 spectrophotometer in  $\text{CH}_3\text{CN}$  solution at 298K. To 10 mm cuvette was added 2.5 mL of  $4.0 \times 10^{-5}$  M solution of studied receptor and in case of salts binding studies 1 molar equivalent of cation ( $\text{KPF}_6$ ,  $\text{NaClO}_4$  or  $\text{NH}_4\text{PF}_6$ ) was added. Small aliquots of  $\sim 1.5 \times 10^{-3}$  M guest solution (anion or cation) containing the receptor **1** at the same concentration as in cuvette, were added and a spectrum was acquired. The resulting titration data were analysed by the HypSpec program to obtain the association constant ( $K_a$ ). The stoichiometry determination was done using continuous variation method (Job plot).

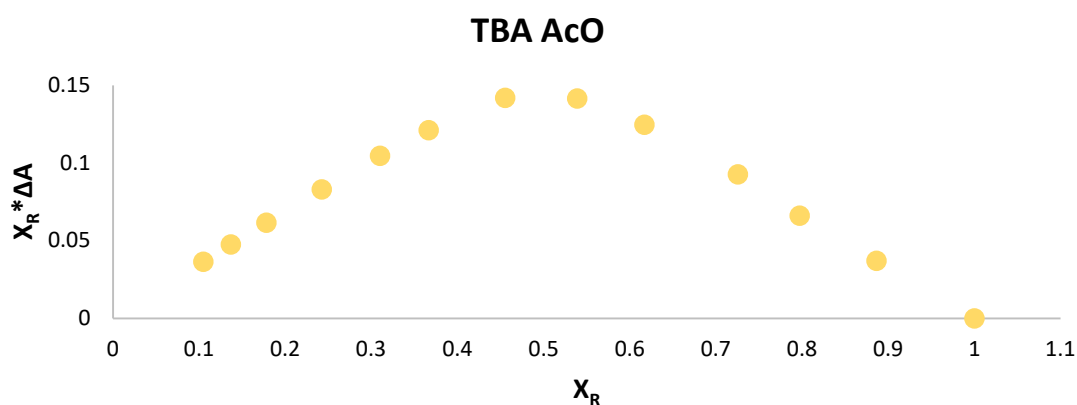

Figure 13. Job plot analysis of the receptor **1** in the presence of TBA AcO

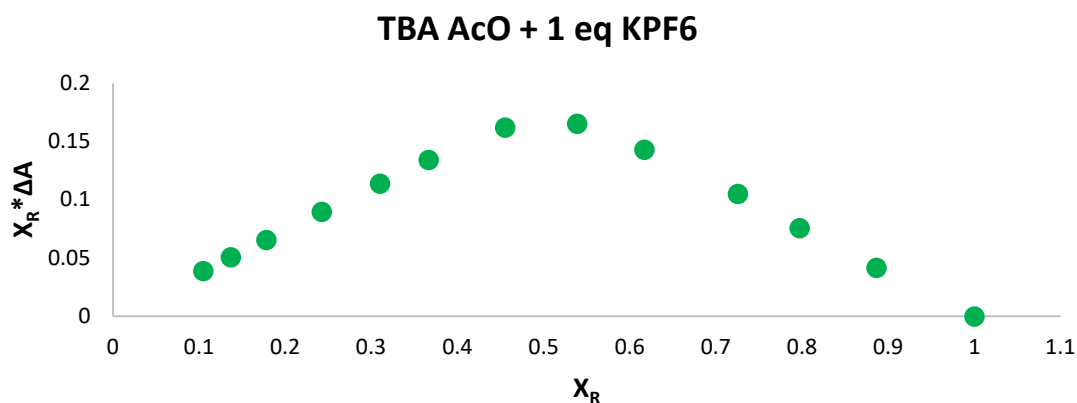

Figure 14. Job plot analysis of the receptor **1** in the presence of TBA AcO in presence of 1 eq  $\text{KPF}_6$

- CH<sub>3</sub>CN solution

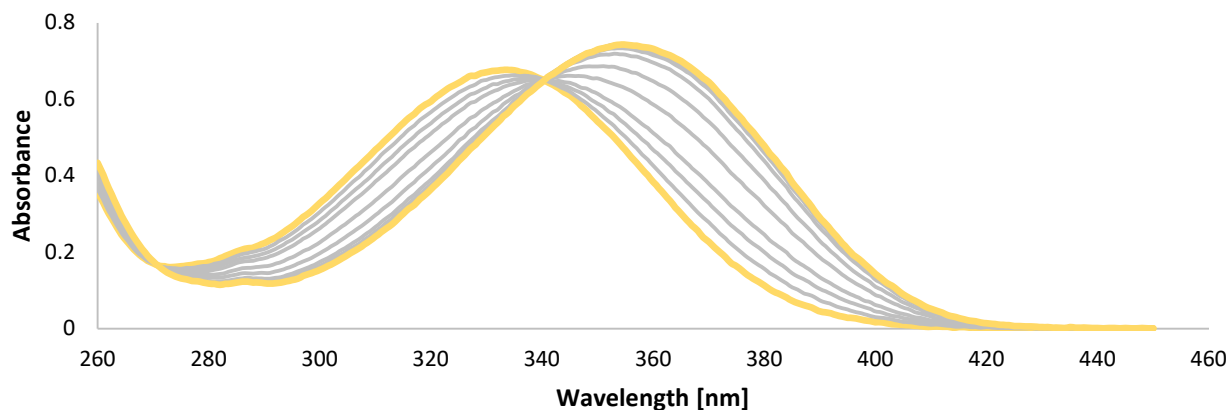

**Figure 15.** UV-Vis **1** spectrum changes upon titrant (TBA AcO) addition (293 K, CH<sub>3</sub>CN solution,  $C_{\text{titrant}}=1.3 \times 10^{-3}\text{M}$ ,  $C_{\text{receptor}}=4.0 \times 10^{-5}\text{M}$ )

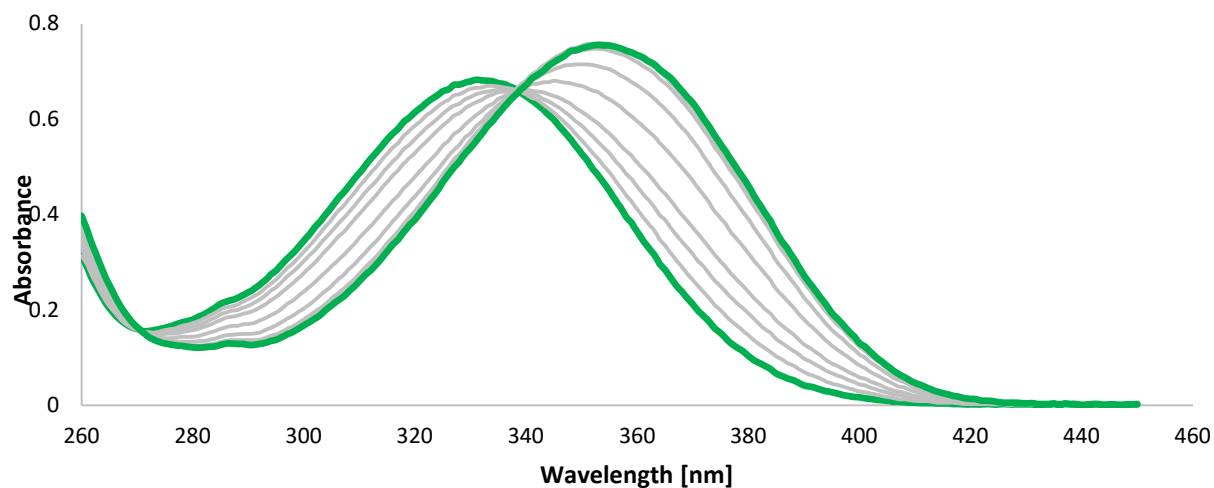

**Figure 16.** UV-Vis **1** spectrum changes upon titrant (TBA AcO) addition in presence of 1 eq. KPF<sub>6</sub> (293 K, CH<sub>3</sub>CN solution,  $C_{\text{titrant}}=1.3 \times 10^{-3}\text{M}$ ,  $C_{\text{receptor}}=4.0 \times 10^{-5}\text{M}$ )

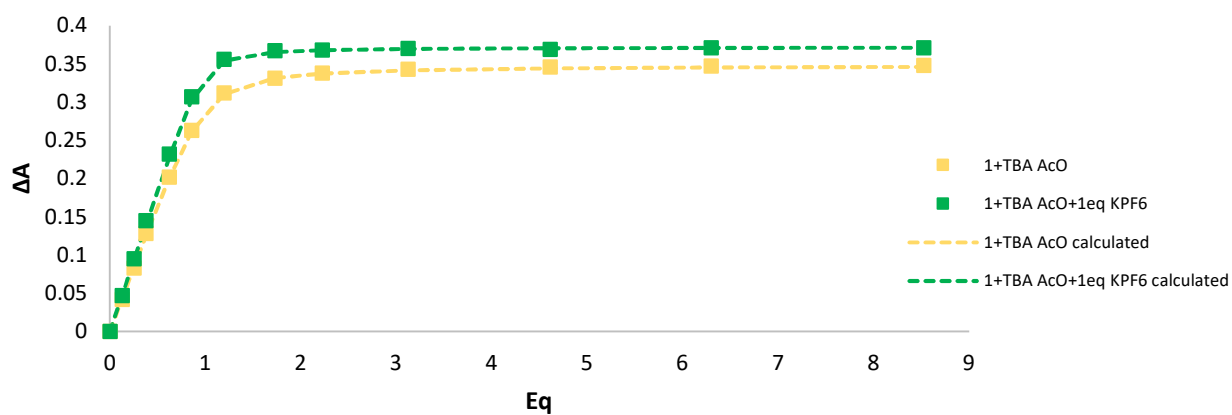

**Figure 17.** UV-Vis titration binding isotherms (experimental and calculated) of the receptor **1** with TBA AcO in the presence of one equivalent of cations ( $\lambda=360 \text{ nm}$ ) (293 K, CH<sub>3</sub>CN solution)

- 1% H<sub>2</sub>O/CH<sub>3</sub>CN solution

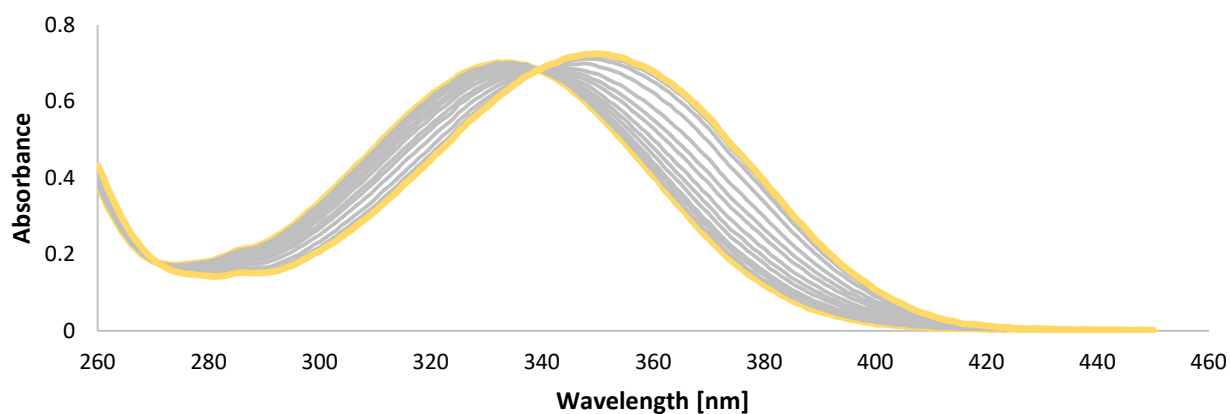

**Figure 18.** UV-Vis **1** spectrum changes upon titrant (TBA AcO) addition (293 K, 1% H<sub>2</sub>O/CH<sub>3</sub>CN solution,  $C_{\text{titrant}}=1.2 \times 10^{-3}\text{M}$ ,  $C_{\text{receptor}}=4.1 \times 10^{-5}\text{M}$ )

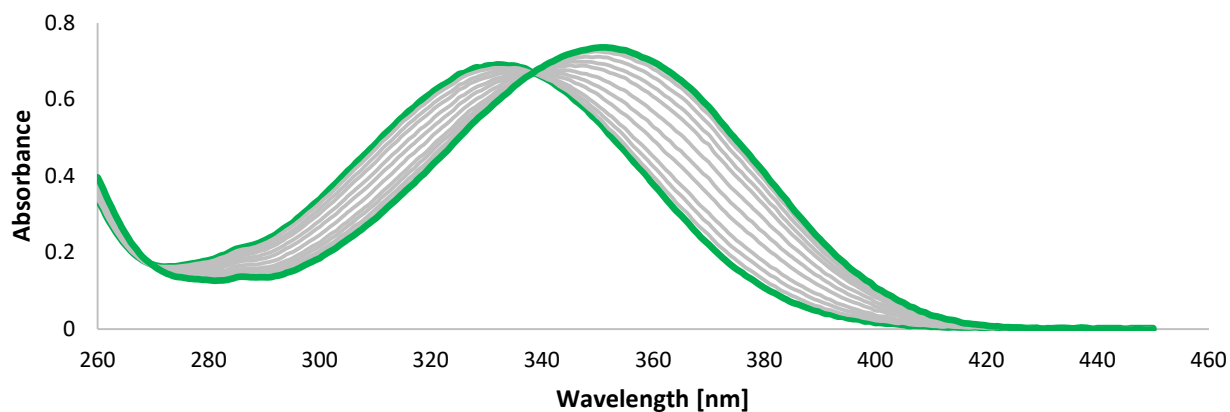

**Figure 19.** UV-Vis **1** spectrum changes upon titrant (TBA AcO) addition in presence of 1 eq. KPF<sub>6</sub> (293 K, 1% H<sub>2</sub>O/CH<sub>3</sub>CN solution,  $C_{\text{titrant}}=1.2 \times 10^{-3}\text{M}$ ,  $C_{\text{receptor}}=4.1 \times 10^{-5}\text{M}$ )

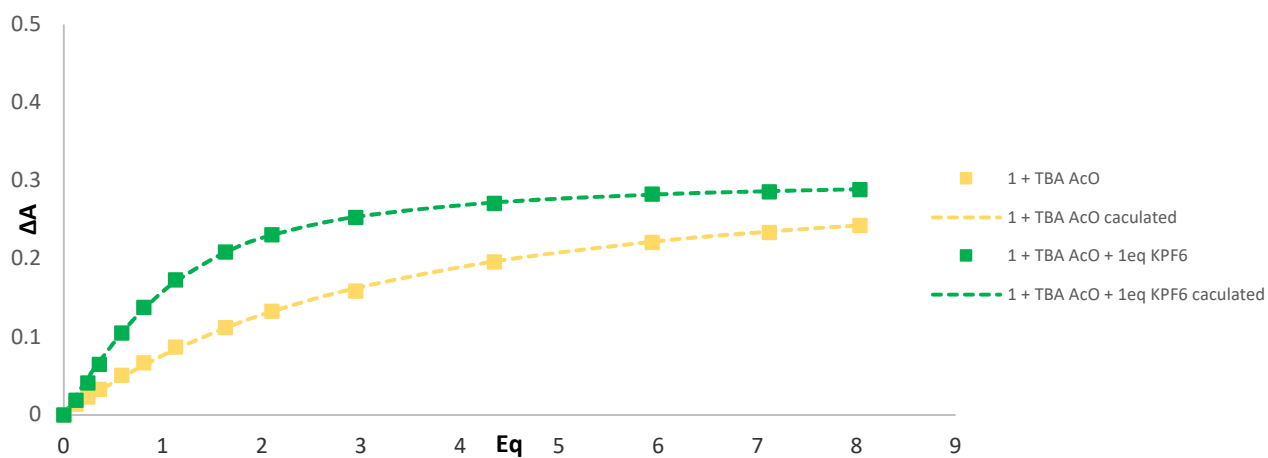

**Figure 20.** UV-Vis titration binding isotherms (experimental and calculated) of the receptor **1** with TBA AcO in the presence of one equivalent of cations ( $\lambda=360 \text{ nm}$ ) (293 K, 1% H<sub>2</sub>O/CH<sub>3</sub>CN solution)

- 3% H<sub>2</sub>O/CH<sub>3</sub>CN solution

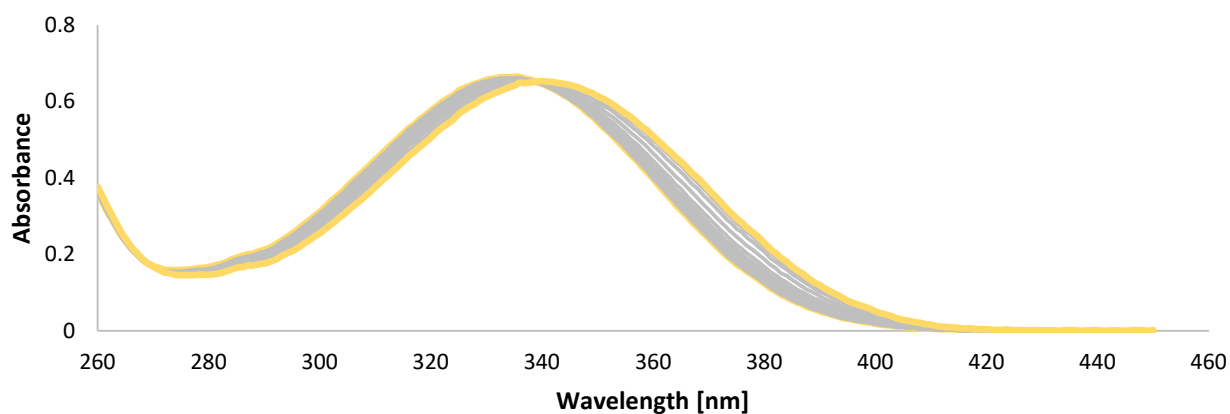

**Figure 21.** UV-Vis **1** spectrum changes upon titrant (TBA AcO) addition (293 K, 1% H<sub>2</sub>O/CH<sub>3</sub>CN solution,  $C_{\text{titrant}}=2.8 \times 10^{-3}\text{M}$ ,  $C_{\text{receptor}}=3.9 \times 10^{-5}\text{M}$ )

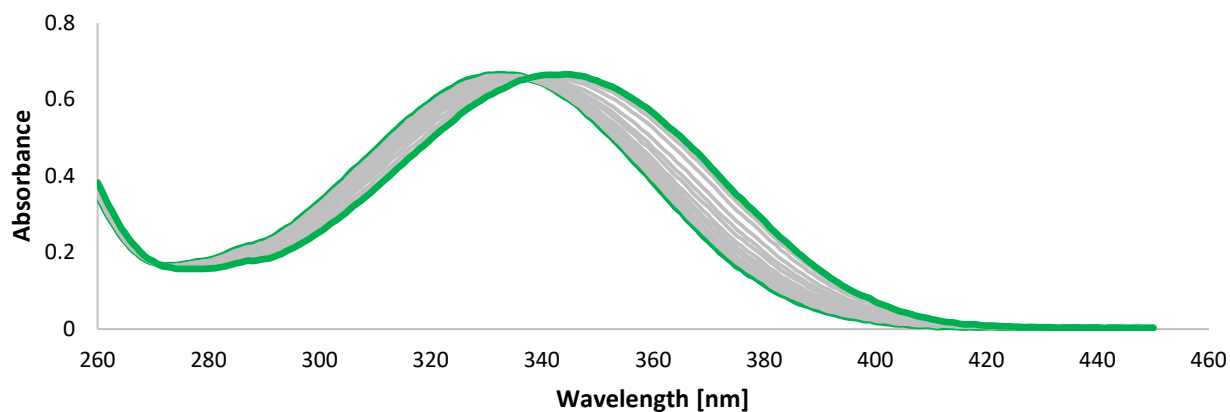

**Figure 22.** UV-Vis **1** spectrum changes upon titrant (TBA AcO) addition in presence of 1 eq. KPF<sub>6</sub> (293 K, 3% H<sub>2</sub>O/CH<sub>3</sub>CN solution,  $C_{\text{titrant}}=2.8 \times 10^{-3}\text{M}$ ,  $C_{\text{receptor}}=3.9 \times 10^{-5}\text{M}$ )

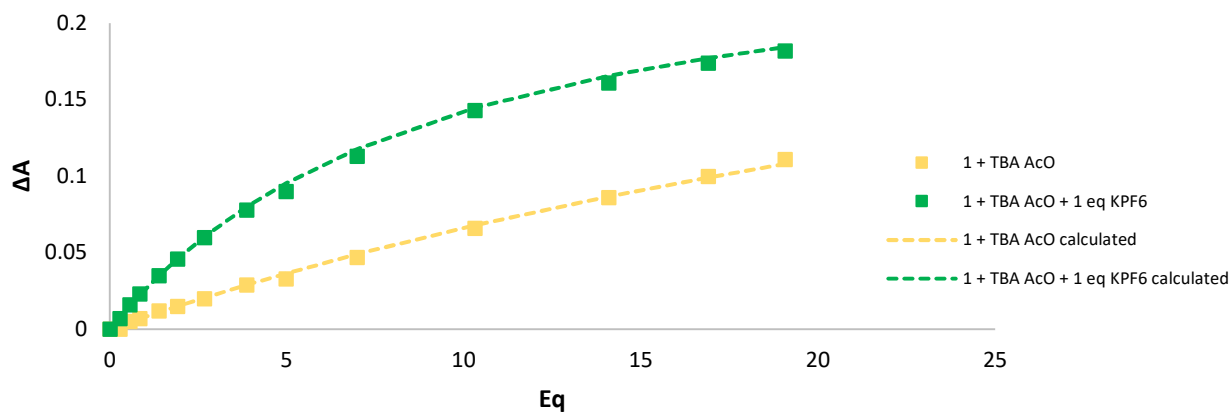

**Figure 23.** UV-Vis titration binding isotherms (experimental and calculated) of the receptor **1** with TBA AcO in the presence of one equivalent of cations ( $\lambda=360 \text{ nm}$ ) (293 K, 3% H<sub>2</sub>O/CH<sub>3</sub>CN solution)

| Solvent                                | Ion                | TBA <sup>+</sup>   | KPF <sub>6</sub>     |
|----------------------------------------|--------------------|--------------------|----------------------|
| CH <sub>3</sub> CN                     | AcO <sup>-</sup>   | 580 000<br>(0.25%) | 1 700 000<br>(0.64%) |
|                                        | $K_M/K_{TBA\ AcO}$ | -                  | 2.93                 |
| 1% H <sub>2</sub> O/CH <sub>3</sub> CN | AcO <sup>-</sup>   | 11 000<br>(0.09%)  | 52 000<br>(0.12%)    |
|                                        | $K_M/K_{TBA\ AcO}$ | -                  | 4.72                 |
| 3% H <sub>2</sub> O/CH <sub>3</sub> CN | AcO <sup>-</sup>   | 970<br>(0.57%)     | 3400<br>(0.11%)      |
|                                        | $K_M/K_{TBA\ AcO}$ |                    | 3.51                 |

**Figure 24.** UV-Vis spectroscopy  $K_{obs}$  values (298 K) for interactions of **1** with AcO<sup>-</sup> in present or absence of potassium cation and standard errors values in parentheses

## 4. NMR titration experiments

<sup>1</sup>H NMR titration experiments were performed on a 300 MHz Bruker Avance spectrometer, at 298K, in CD<sub>3</sub>CN solution. In each case 0.5 mL of  $3.2 \times 10^{-3}$  M solution of the receptor **1** was added to 5 mm NMR tube. The receptor solution contains or not 1 mol eq. of sodium, potassium cation or ammonium cation. Then to the receptor solution the titrant solution of tetrabutylammonium acetate in the receptor solution ( $1.9 \times 10^{-1}$  M) was added. After each addition of the titrant, a spectrum was registered. The resulting titration data were analyzed by Bindfit.<sup>2</sup>

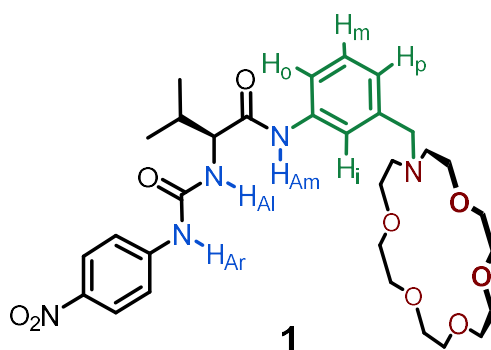

**Figure 25.** Structure of receptor **1** with description.

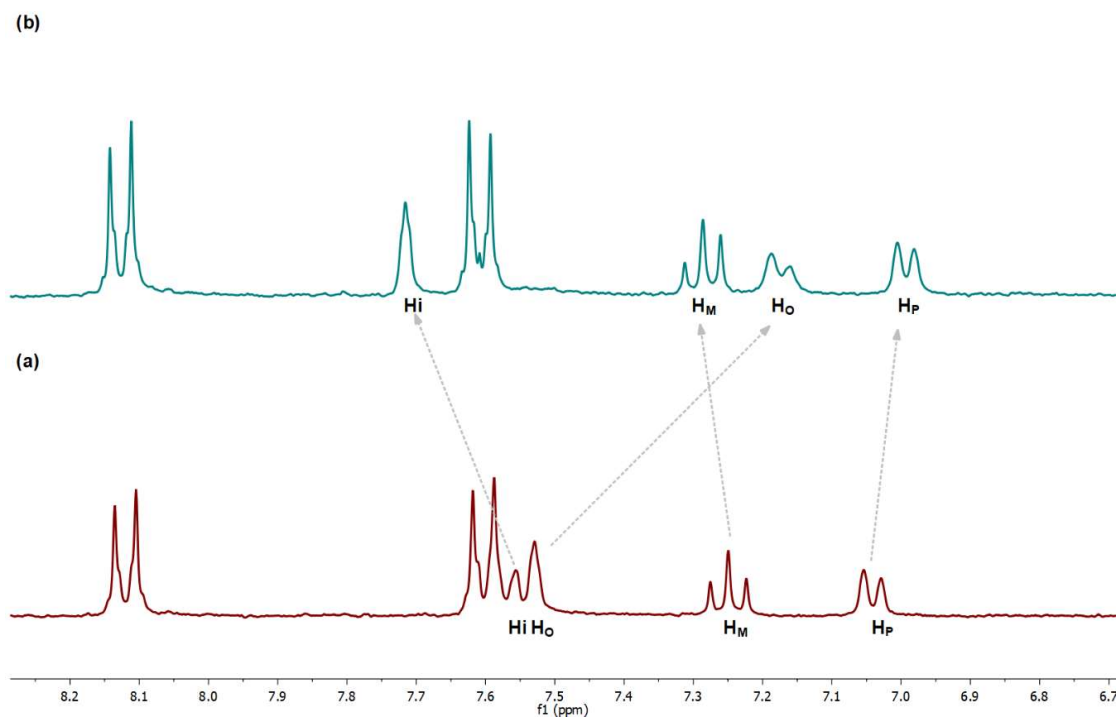

**Figure 26.** Partial  $^1\text{H}$  NMR titration experiment of **1** (a) spectrum without cation addition (b) spectrum after addition of 1 eq  $\text{KPF}_6$  (293 K, 3%  $\text{H}_2\text{O}/\text{CD}_3\text{CN}$  solution,  $C_{\text{KPF}_6}=1.8 \times 10^{-1}\text{M}$ ,  $C_{\text{receptor}}=3.8 \times 10^{-3}\text{M}$ )

- 3%  $\text{H}_2\text{O}/\text{CD}_3\text{CN}$

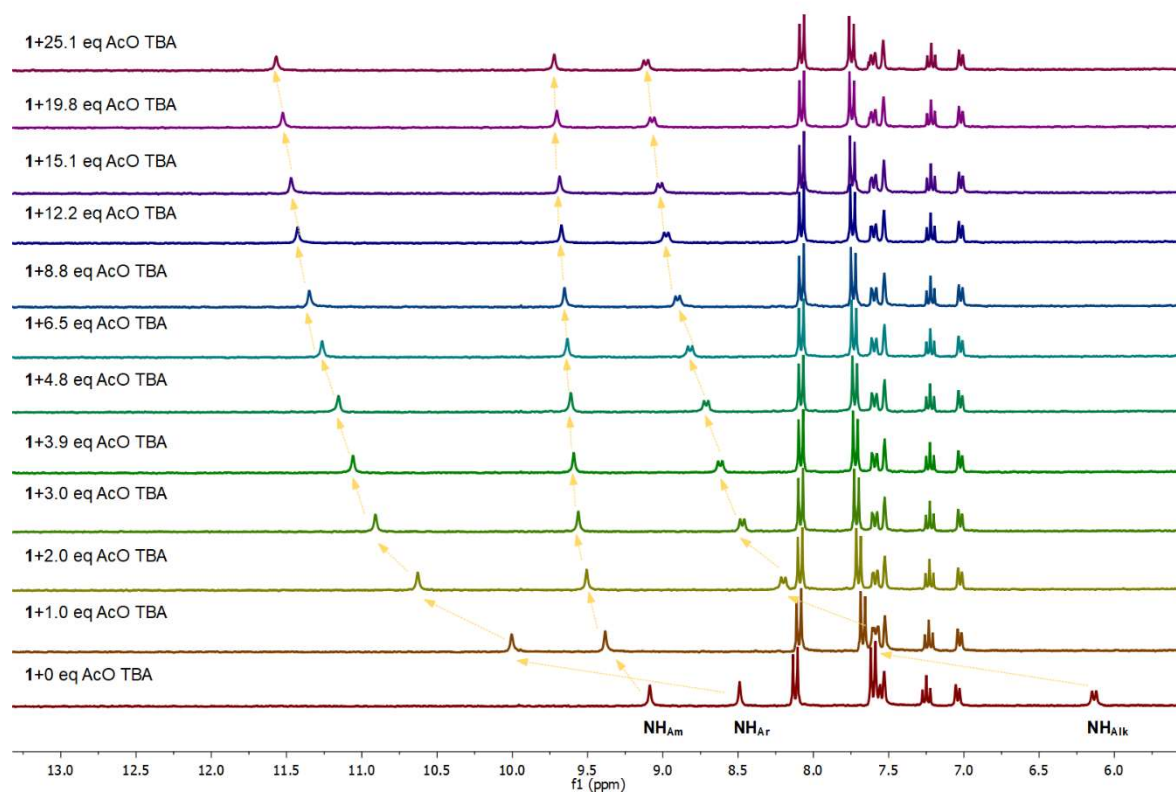

**Figure 27.** Partial  $^1\text{H}$  NMR titration experiment of **1** upon titrant (TBA AcO) addition, (293 K, 3%  $\text{H}_2\text{O}/\text{CD}_3\text{CN}$  solution,  $C_{\text{titrant}}=1.9 \times 10^{-1}\text{M}$ ,  $C_{\text{receptor}}=3.8 \times 10^{-3}\text{M}$ )

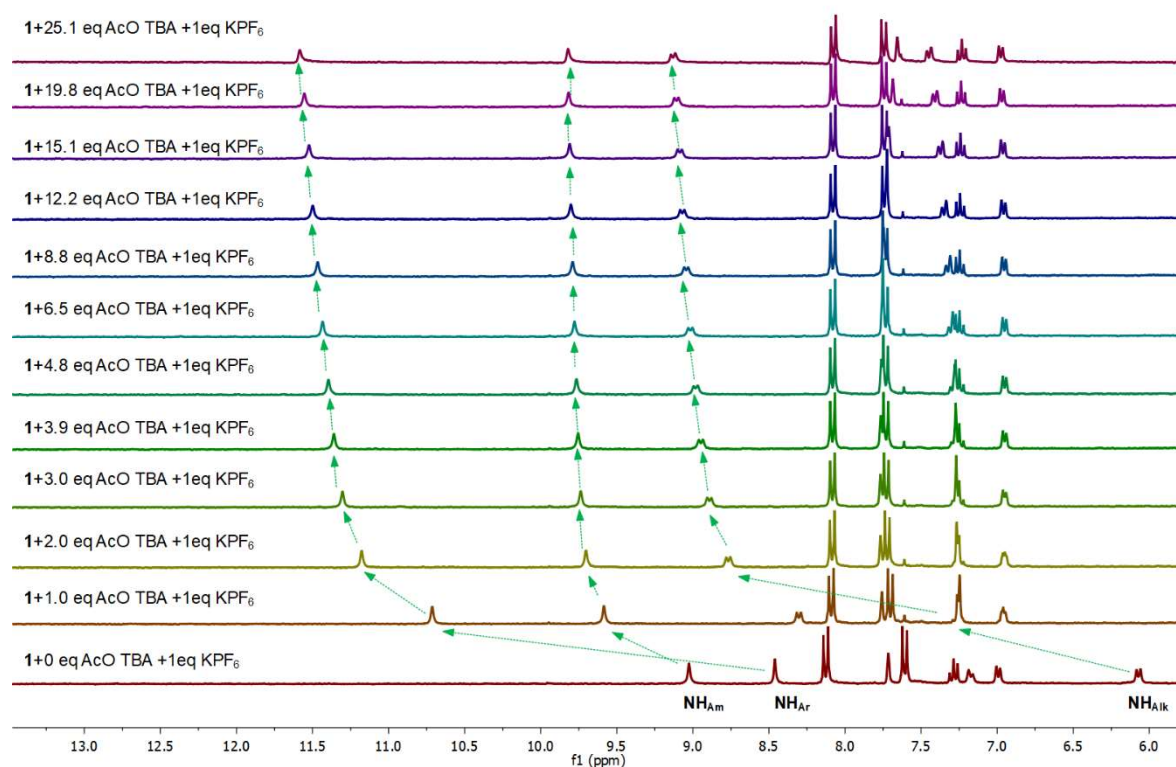

**Figure 28.** Partial  $^1\text{H}$  NMR titration experiment of **1** upon titrant (TBA AcO) addition in presence of 1eq.  $\text{KPF}_6$ , (293 K, 3% $\text{H}_2\text{O}/\text{CD}_3\text{CN}$  solution,  $C_{\text{titrant}}=1.9 \times 10^{-1}\text{M}$ ,  $C_{\text{receptor}}=3.8 \times 10^{-3}\text{M}$ )

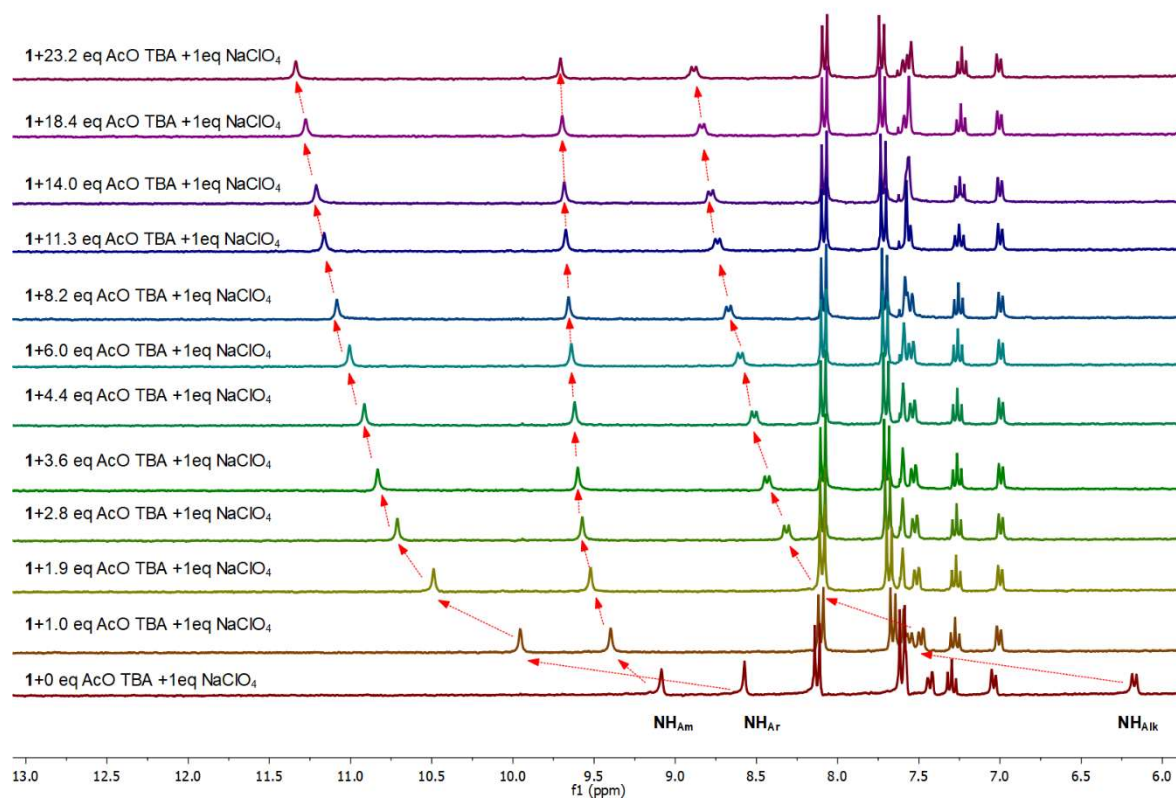

**Figure 29.** Partial  $^1\text{H}$  NMR titration experiment of **1** upon titrant (TBA AcO) addition in the presence of 1eq.  $\text{NaClO}_4$ , (293 K, 3% $\text{H}_2\text{O}/\text{CD}_3\text{CN}$  solution,  $C_{\text{titrant}}=1.9 \times 10^{-1}\text{M}$ ,  $C_{\text{receptor}}=3.9 \times 10^{-3}\text{M}$ )

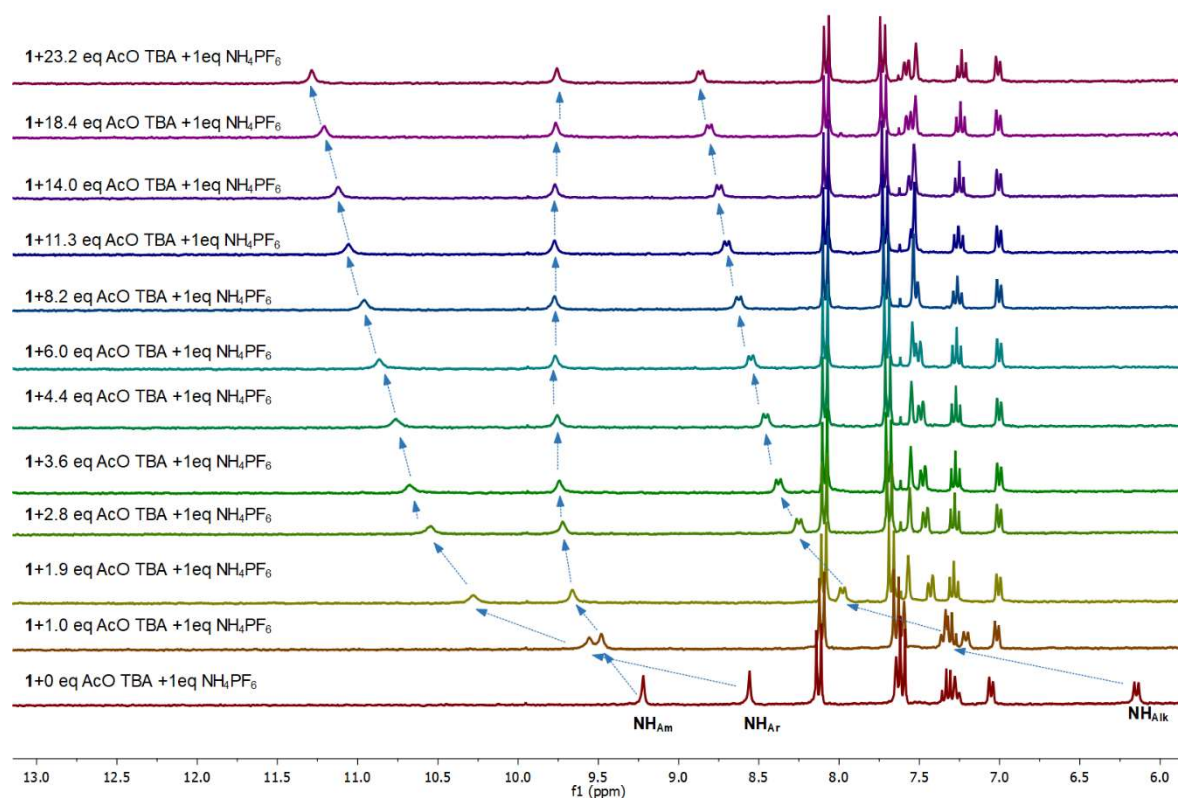

**Figure 30.** Partial  $^1\text{H}$  NMR titration experiment of **1** upon titrant (TBA AcO) addition in the presence of 1eq.  $\text{NH}_4\text{PF}_6$ , (293 K, 3% $\text{H}_2\text{O}/\text{CD}_3\text{CN}$  solution,  $C_{\text{titrant}}=1.9 \times 10^{-1}\text{M}$ ,  $C_{\text{receptor}}=3.9 \times 10^{-3}\text{M}$ )

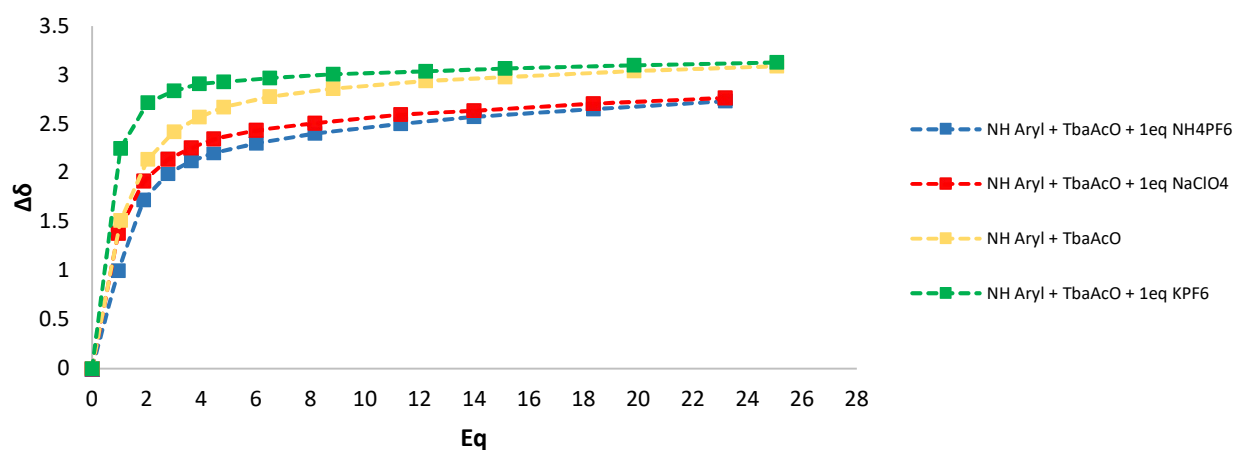

**Figure 31.**  $^1\text{H}$  NMR titration binding isotherm of **1** with TBA AcO in the presence or absence of 1 eq. of cations, 3% $\text{H}_2\text{O}/\text{CD}_3\text{CN}$  solution

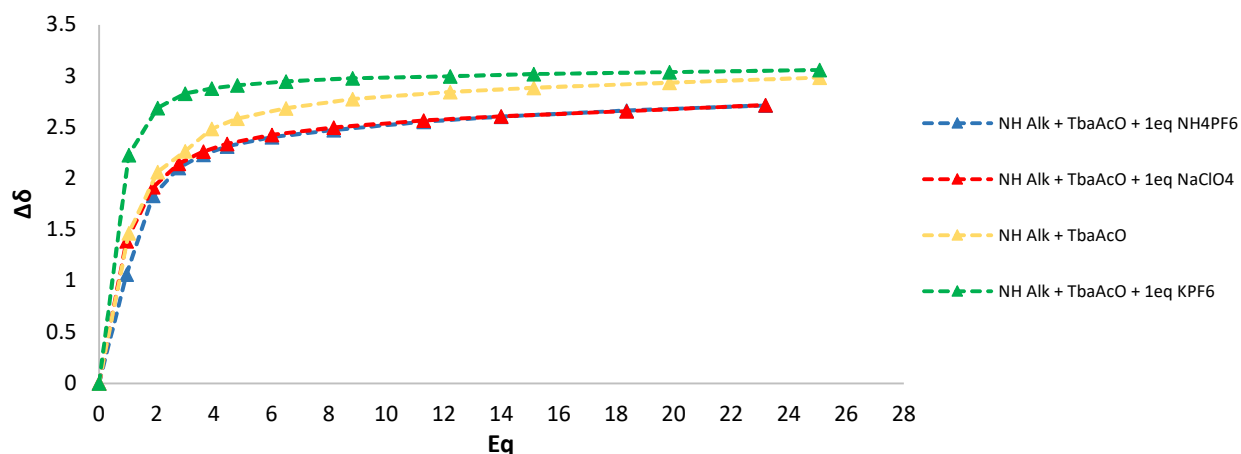

**Figure 32.**  $^1\text{H}$  NMR titration binding isotherm of **1** with TBA AcO in the presence or absence of 1 eq. of cations, 3% $\text{H}_2\text{O}/\text{CD}_3\text{CN}$  solution

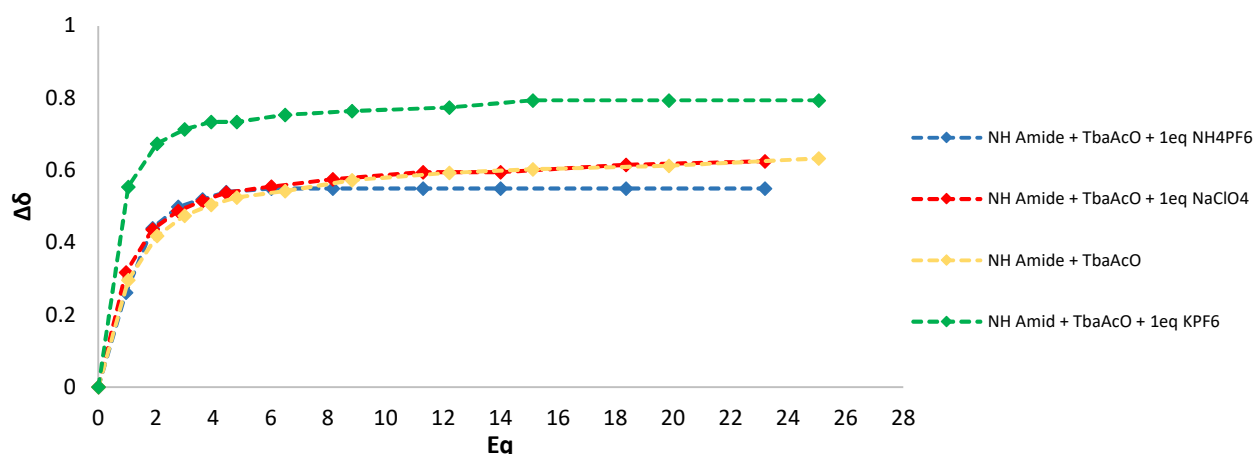

**Figure 33.**  $^1\text{H}$  NMR titration binding isotherm of **1** with TBA AcO in the presence or absence of 1 eq. of cations, 3% $\text{H}_2\text{O}/\text{CD}_3\text{CN}$  solution

| Solvent                                      | Ion                      | TBA <sup>+</sup> | NaClO <sub>4</sub> | KPF <sub>6</sub> | NH <sub>4</sub> PF <sub>6</sub> |
|----------------------------------------------|--------------------------|------------------|--------------------|------------------|---------------------------------|
| 3% $\text{H}_2\text{O}/\text{CH}_3\text{CN}$ | AcO <sup>-</sup>         | 420<br>(4.9%)    | 500<br>(8.7%)      | 2060<br>(13.4%)  | 330<br>(9.1%)                   |
|                                              | $K_M/K_{TBA\text{ AcO}}$ | -                | 1.19               | 4.90             | 0.79                            |

**Figure 34.** NMR spectroscopy  $K_{\text{obs}}$  values (298 K) for interactions of **1** with AcO<sup>-</sup> in the presence or absence of potassium cation and standard errors values in parentheses

## 5. NMR extraction experiments

$^1\text{H}$  NMR extraction experiments were performed on a 300 MHz Bruker Avance spectrometer, at 298K, in  $\text{CDCl}_3$  solution. In each case 0.5 mL of  $2.5 \times 10^{-2}$  M solution of the receptor **1** was washed with water, then after phase separation, the receptor **1** solution was extracted with aqueous solution of salts for 1 minute. The equivalent of salt in water solution was calculated based on molarity of the receptor in chloroform phase. *For example: 0.5 ml of chloroform solution of the receptor 1 ( $2.5 \times 10^{-2}$ ) was extracted with 0.5 ml of AcOK water solution ( $2.5 \times 10^{-1}$ ) which corresponded to 10 eq.* Then chloroform phase

containing receptor-salt complex was washed with water ('back' extraction), to prove the reversibility of extraction process. After each step of the experiment  $^1\text{H}$  NMR spectrum was registered. The efficiency of the extraction process was calculated on the basis of the carboxylate alkyl signals integration values, assuming the receptor as an internal standard. The 100% efficiency corresponds to fully salt loaded receptor.

- Control experiment checking salt affinity to aqueous phase. Conformation that AcOK in LLE experiment condition was not extracted with chloroform.

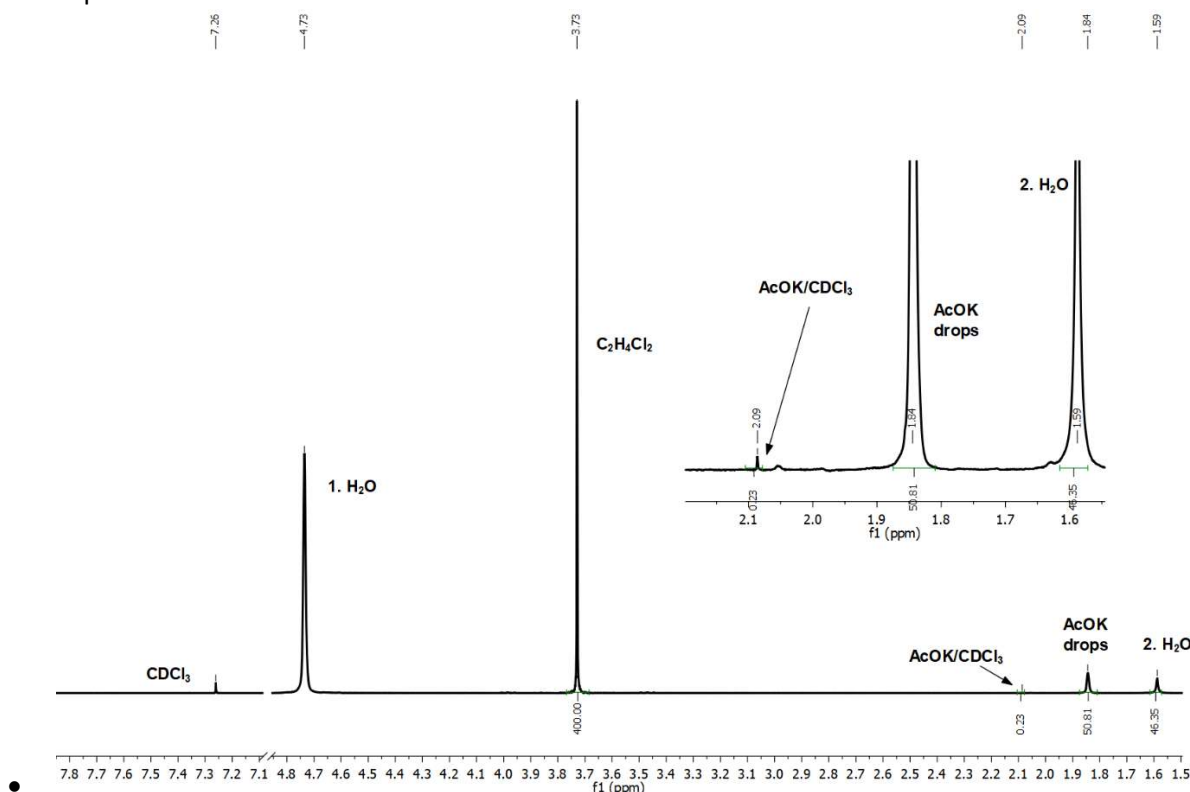

**Figure 35.** Liquid-Liquid extraction of AcOK aqua solution  $C=3.2\text{ M}$  which corresponds to 130 eq. when the receptor solution is present with  $\text{CDCl}_3$ . 1  $\text{H}_2\text{O}$  is peak corresponding to water in drops on the NMR tubes walls. 2  $\text{H}_2\text{O}$  is water in  $\text{CDCl}_3$ . Potassium acetate concentration was measured based on addition of  $10\text{ }\mu\text{L}$  of 1,2-dichloroethane as internal standard and it was  $1.93 \times 10^{-7}$ . The efficiency of this process was  $6 \times 10^{-6}\%$  based on internal standard.

- On the spectrum above and many spectras under the peak 1.84-1.88 can be observed. This peak corresponds to the potassium acetate in water droplets remaining on the walls of NMR tube. The intensity of this signal depended on the concentration of the potassium acetate in water and the quality of phase separation. Nevertheless, the presence of this signal does not affect extraction experiment efficiency and quality, because the peak of potassium acetate in  $\text{CDCl}_3$  has different chemical shift 2.09-2.13. Moreover, we tried to simulate the most realistic conditions of the extraction process therefore we did not perform any additional treatments of the NMR sample.

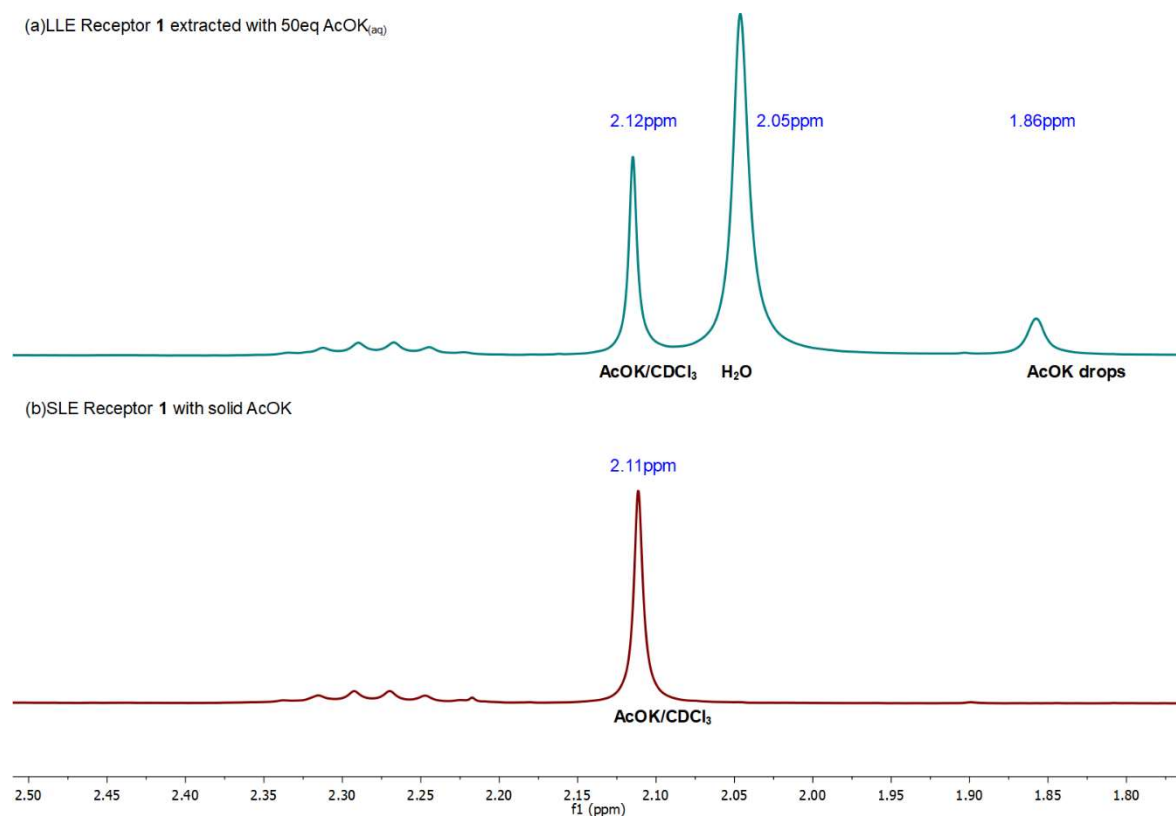

**Figure 36.** Partial  $^1\text{H}$  NMR spectrum of the receptor **1** (a) LLE extraction  $C_{\text{receptor}}=2.5 \times 10^{-2}\text{M}$ ,  $C_{\text{AcOK}}=1.25\text{M}$  (b) SLE extraction  $C_{\text{receptor}}=2.5 \times 10^{-2}\text{M}$ , solid AcOK was added.

- Control experiment checking receptor **1**•AcOK complex affinity to the organic phase and possible decline of the receptor was carried out.

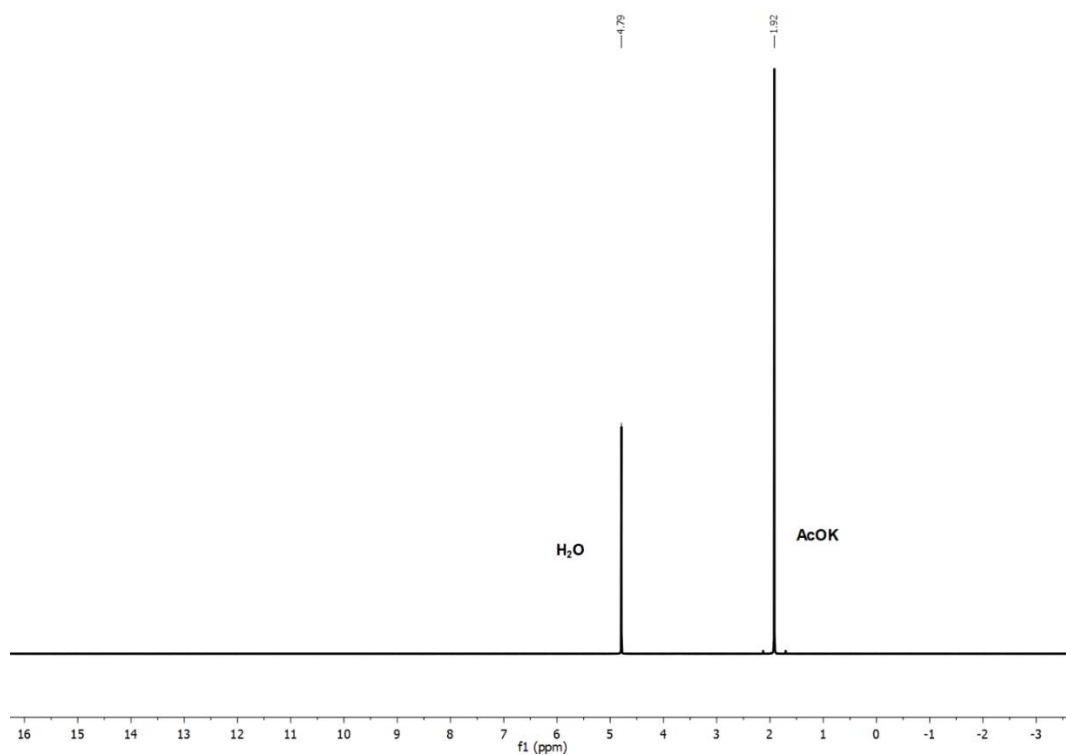

**Figure 37.**  $^1\text{H}$  NMR spectrum of  $\text{D}_2\text{O}$  phase used as 'back' extraction phase on receptor **1**  $C_{\text{receptor}}=2.5 \times 10^{-2}\text{M}$  complex with AcOK. No receptor peaks were observed on this spectrum.

- Extraction studies

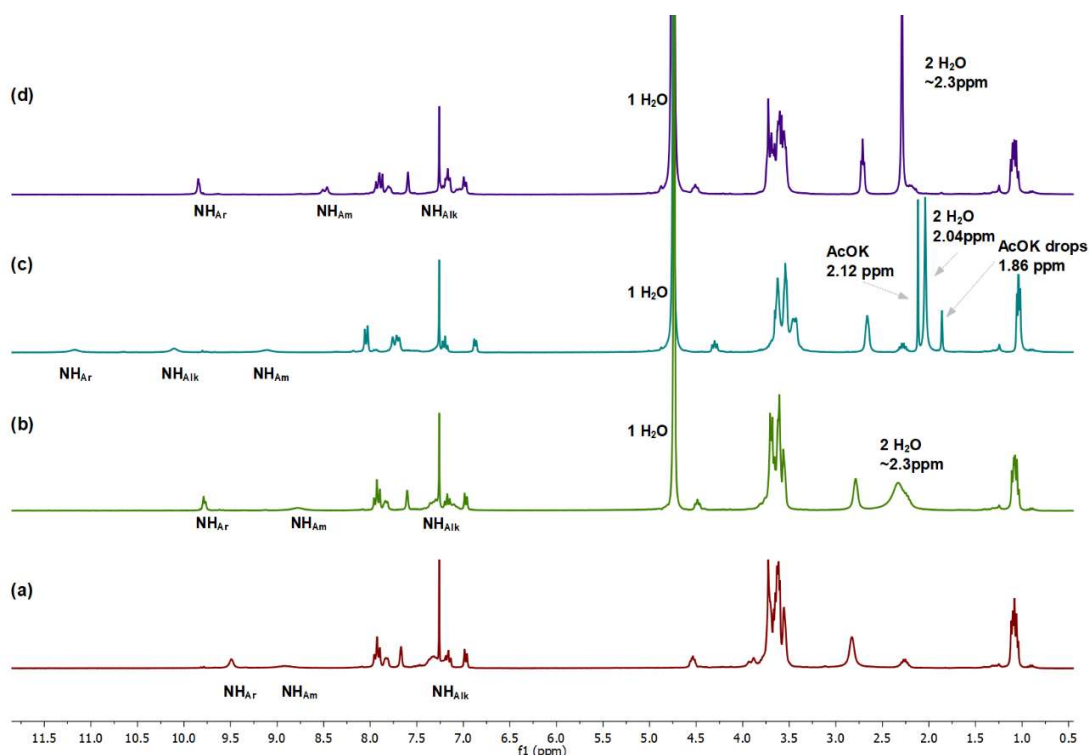

**Figure 38.**  $^1\text{H}$  NMR spectrum stack of extraction experiment steps. (a) The receptor **1** dissolved in 'dry'  $\text{CDCl}_3$  ( $C_{\text{receptor}}=2.5 \times 10^{-2}\text{M}$ ); (b) The receptor **1** solution after being washed with deionized water; (c) The receptor **1** solution after extraction with 50 eq AcOK aqueous solution ( $C_{\text{AcOK}}=1.25\text{M}$ ); (d) The receptor **1** solution after 'back extraction'- washed with deionized water. (1  $\text{H}_2\text{O}$ -  $\text{H}_2\text{O}/\text{H}_2\text{O}$ ; 2  $\text{H}_2\text{O}$ - $\text{H}_2\text{O}/\text{CDCl}_3$ )

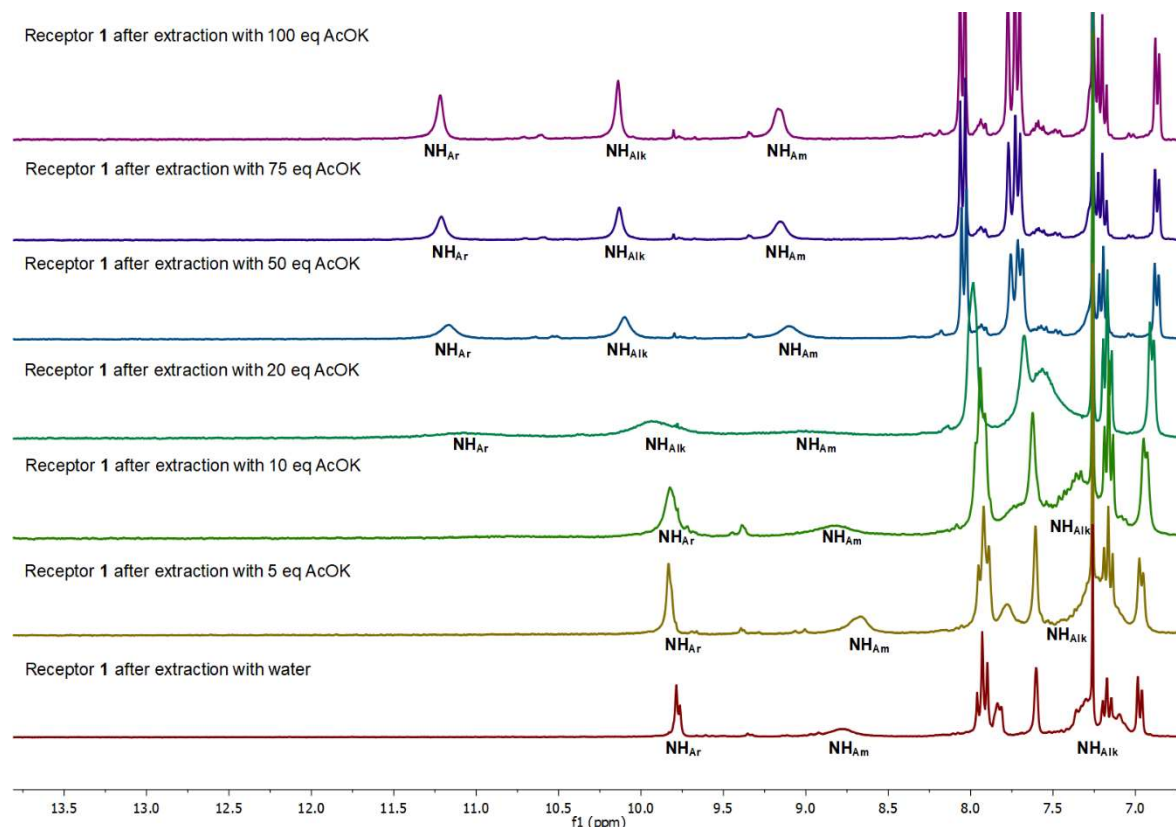

**Figure 39.** Partial  $^1\text{H}$  NMR extraction experiment of **1** after 1 minute extraction with aqueous solutions of potassium acetate (293 K,  $\text{CDCl}_3$ ,  $C_{\text{AcOK}}=0.125\text{-}2.5\text{M}$ ,  $C_{\text{receptor}}=2.5 \times 10^{-2}\text{M}$ )

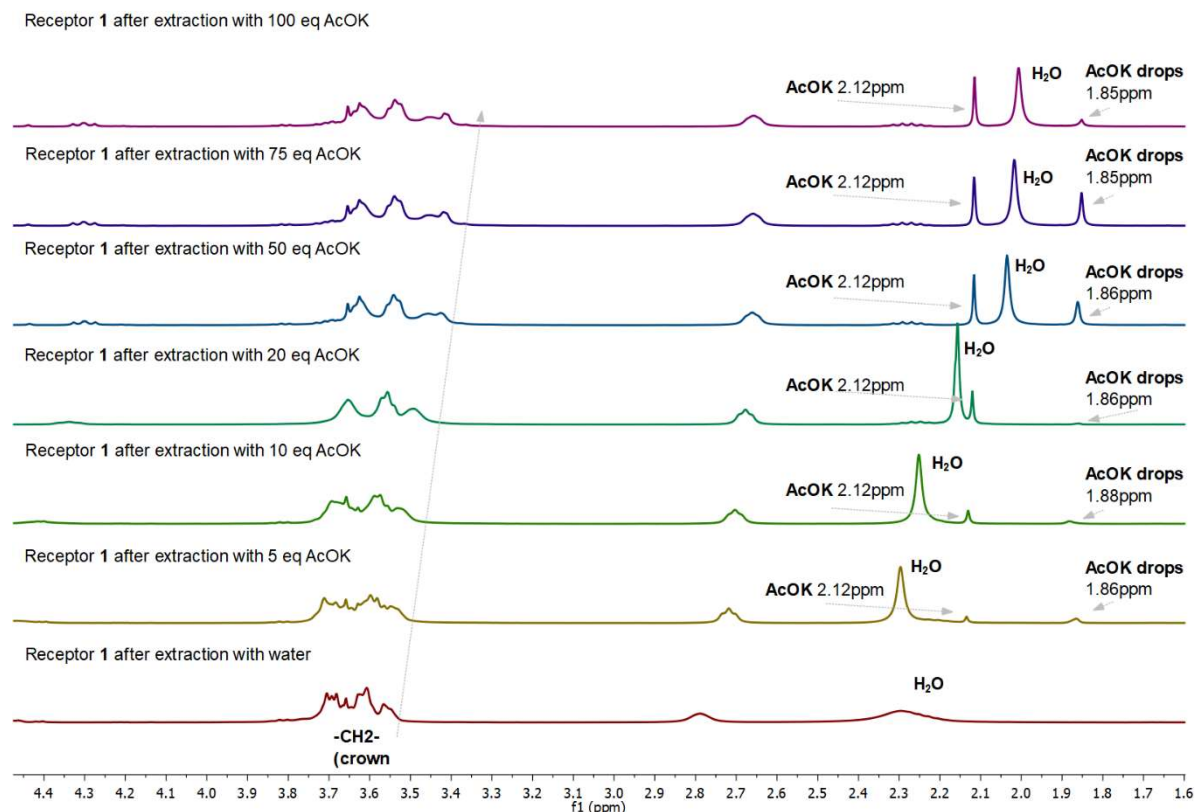

**Figure 40.** Partial  $^1\text{H}$  NMR extraction experiment of **1** after 1 minute extraction with aqueous solutions of potassium acetate (293 K,  $\text{CDCl}_3$ ,  $C_{\text{AcOK}}=0.125\text{-}2.5\text{M}$ ,  $C_{\text{receptor}}=2.5 \times 10^{-2}\text{M}$ )

| $C_{\text{AcOK}}[\text{mol/dm}^3]$ | $C_{\text{receptor}}[\text{mol/dm}^3]$ | Equivalent <sup>(a)</sup> | Extraction efficiency <sup>(b)</sup> |
|------------------------------------|----------------------------------------|---------------------------|--------------------------------------|
| 0.1250                             | 0.0252                                 | 5                         | 13 %                                 |
| 0.2500                             | 0.0252                                 | 10                        | 28 %                                 |
| 0.4963                             | 0.0250                                 | 20                        | 53 %                                 |
| 0.7444                             | 0.0250                                 | 30                        | 71 %                                 |
| 0.9925                             | 0.0250                                 | 40                        | 81 %                                 |
| 1.3127                             | 0.0252                                 | 52                        | 88 %                                 |
| 1.8753                             | 0.0252                                 | 74                        | 94 %                                 |
| 2.5178                             | 0.0252                                 | 100                       | 98 %                                 |
| 3.2732                             | 0.0252                                 | 130                       | 100 %                                |
| 3.7767                             | 0.0252                                 | 150                       | 100 %                                |
| 5.0356                             | 0.0252                                 | 199                       | 100 %                                |

**Figure 41.** Results of  $^1\text{H}$  NMR extraction experiments; <sup>(a)</sup>units of moles of salt vs. units of moles of the receptor in 0.5 ml of solutions; <sup>(b)</sup> Extraction efficiency calculated from the integral value of acetate methyl group. Assuming that 100% efficiency is the value of the integral 3.

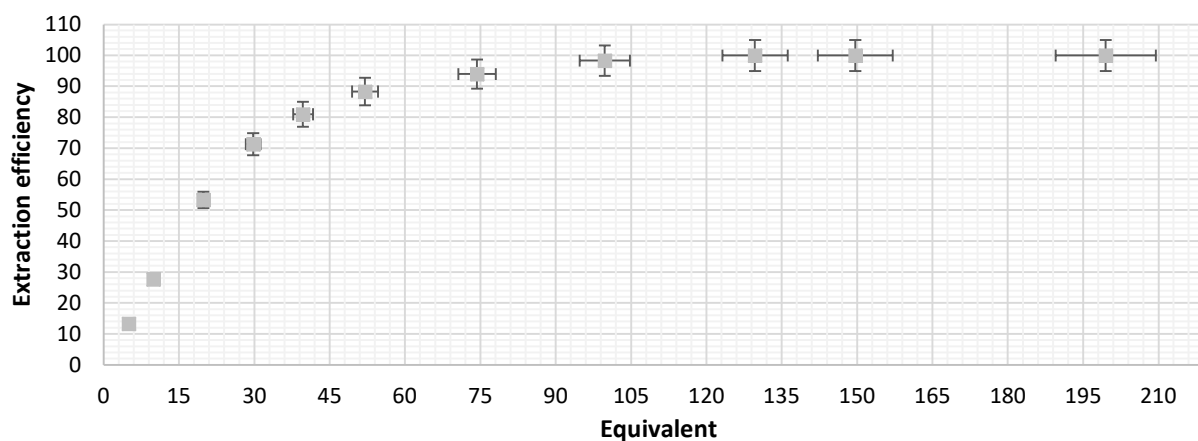

**Figure 42.** Efficiency of extraction process in function of salt concentration. Based on  $^1\text{H}$  NMR extraction experiments.

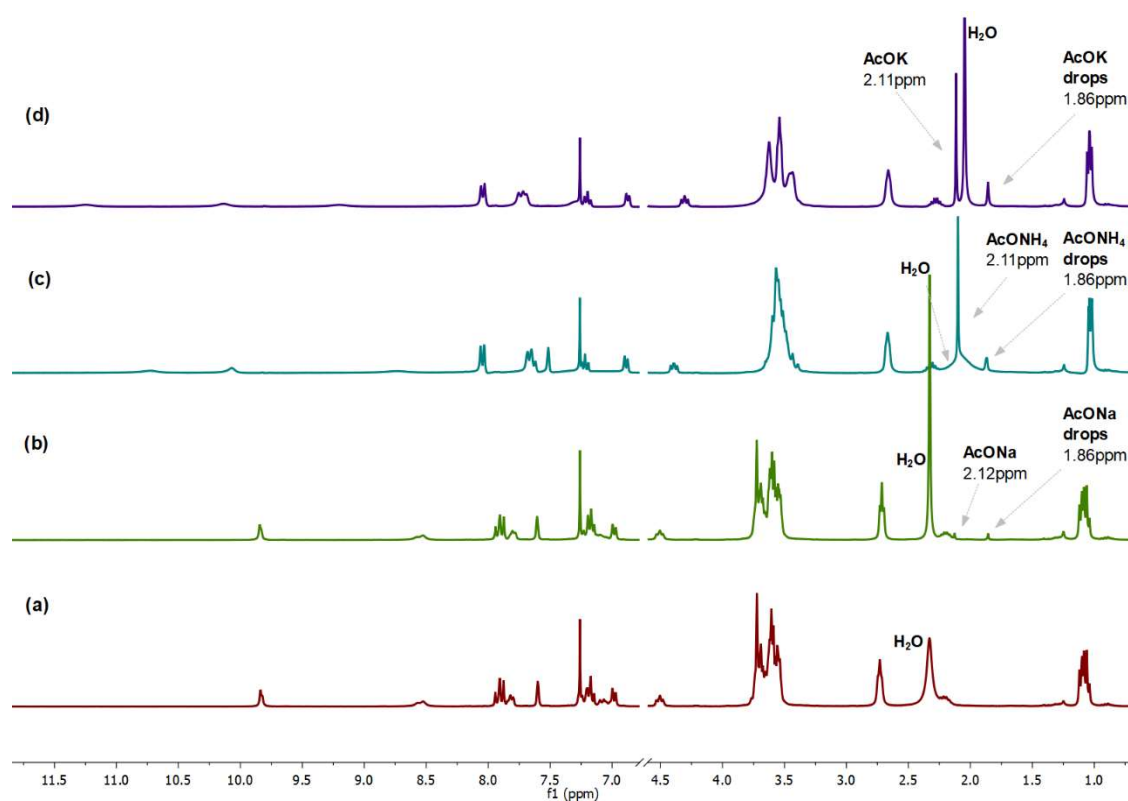

**Figure 43.**  $^1\text{H}$  NMR spectrum stack of extraction experiment steps. ( $C_{\text{receptor}}=2.5 \times 10^{-2}\text{M}$ ); (a) The receptor **1** solution after being washed with deionized water; (b) The receptor **1** solution after extraction with 50 eq AcONa aqua solution ( $C_{\text{AcOK}}=1.25\text{M}$ ); (c) The receptor **1** solution after extraction with 50 eq AcONH<sub>4</sub> aqua solution ( $C_{\text{AcOK}}=1.25\text{M}$ ); (d) The receptor **1** solution after extraction with 50 eq AcOK aqua solution ( $C_{\text{AcOK}}=1.25\text{M}$ )

|                                      | 50 eq AcOK | 50 eq AcONa | 50 eq AcONH <sub>4</sub> |
|--------------------------------------|------------|-------------|--------------------------|
| Extraction efficiency <sup>(a)</sup> | 80%        | 4 %         | ~70% <sup>(b)</sup>      |

**Figure 44.** The results of  $^1\text{H}$  NMR extraction experiments of receptor **1** with different acetates salts; <sup>(a)</sup> The extraction efficiency calculated from the integral value of acetate methyl group. Assuming that 100% efficiency is the value of the integral 3. <sup>(b)</sup> Estimated carefully, during experiment signal corresponding to water molecules rose up acetate methyl group integration value.

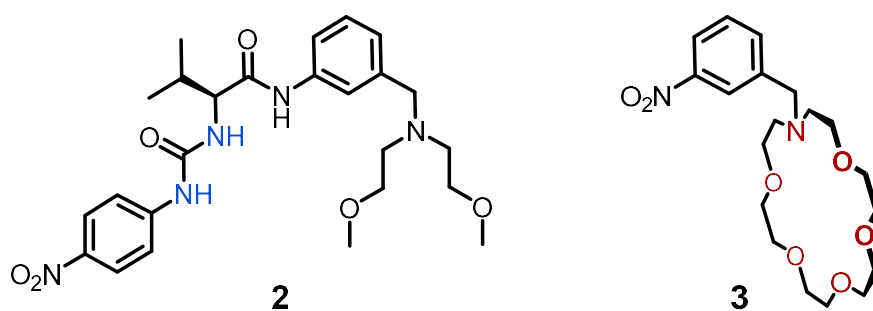

**Figure 45.** Structures of the monotopic receptors **2** and **3**

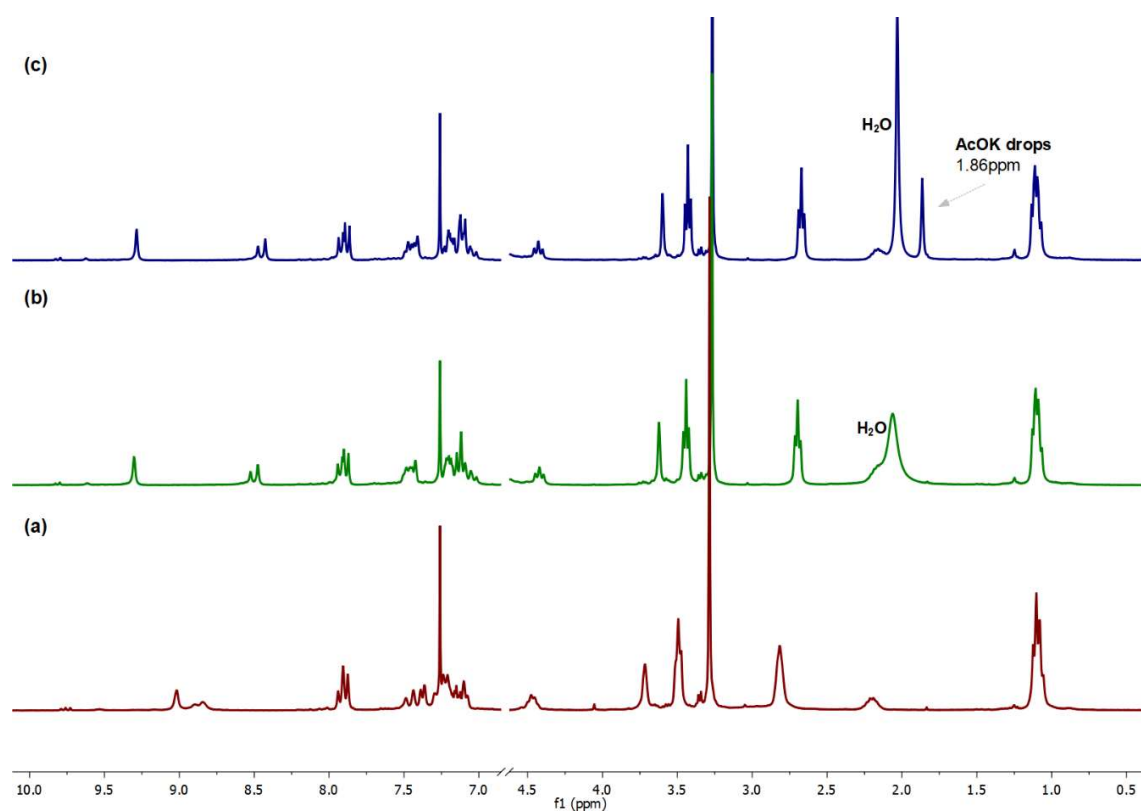

**Figure 46.** Partial  $^1\text{H}$  NMR spectrum stack of Receptor **2**; (a) Receptor **2** dissolved in 'dry'  $\text{CDCl}_3$  ( $C_{\text{receptor}}=2.5 \times 10^{-2}\text{M}$ ); (b) Receptor **2** solution after being washed with deionized water; (c) Receptor **2** solution after the extraction with 50 eq AcOK aqua solution ( $C_{\text{AcOK}}=1.25\text{M}$ )

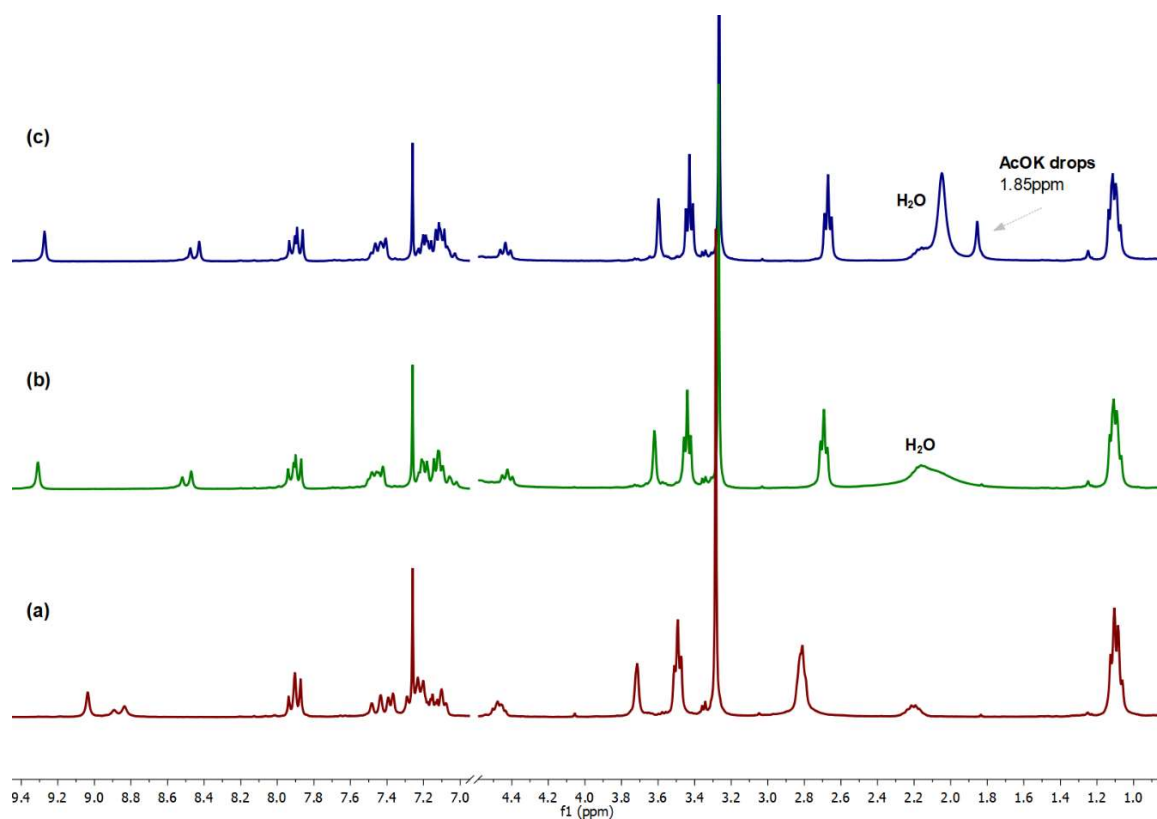

**Figure 47.** Partial  $^1\text{H}$  NMR spectrum stack of Receptor **2**; (a) Receptor **2** dissolved in 'dry'  $\text{CDCl}_3$  ( $C_{\text{receptor}}=2.5 \times 10^{-2}\text{M}$ ); (b) Receptor **2** solution after being washed with deionized water; (c) Receptor **2** solution after the extraction with 100 eq AcOK aqua solution ( $C_{\text{AcOK}}=2.5\text{M}$ )

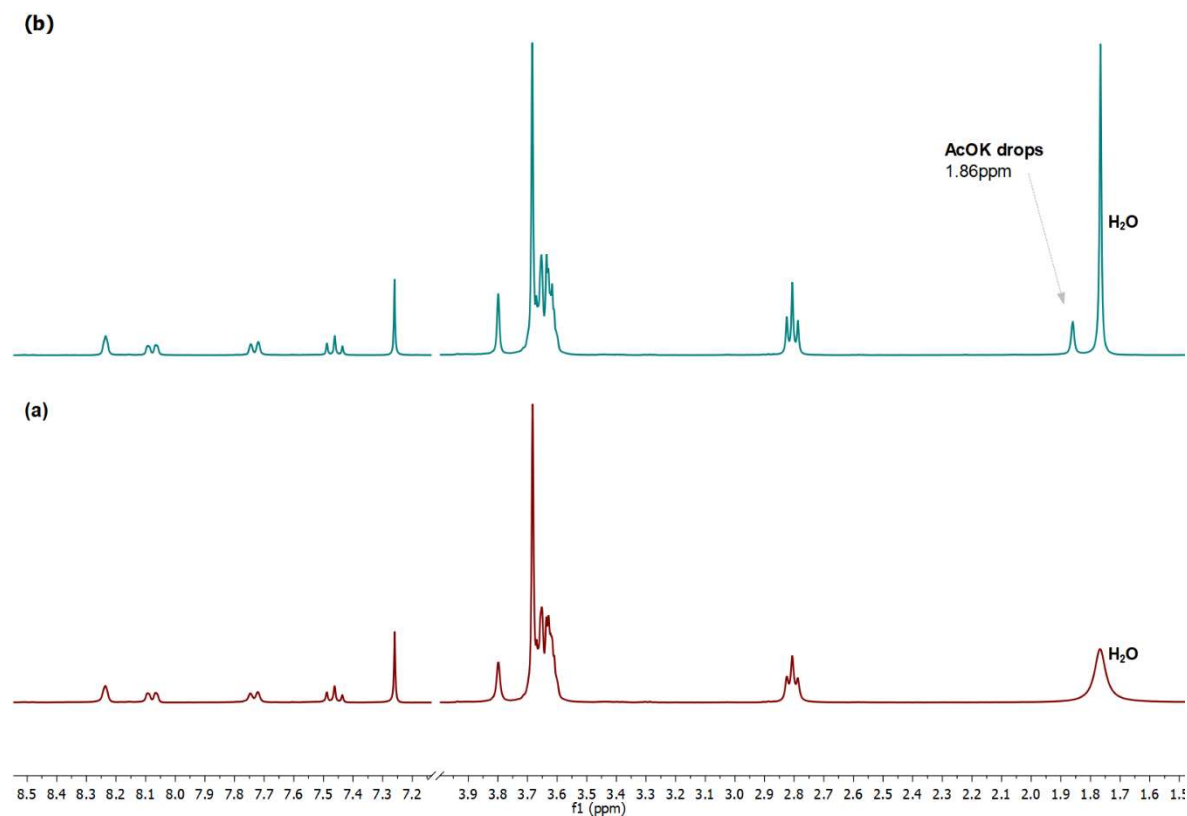

**Figure 48.** Partial  $^1\text{H}$  NMR spectrum stack of Receptor **3**; (a) Receptor **3** solution after being washed with deionized water ( $C_{\text{receptor}}=2.5 \times 10^{-2}\text{M}$ ); (b) Receptor **3** solution after extraction with 50 eq AcOK aqua solution ( $C_{\text{AcOK}}=1.25\text{M}$ )

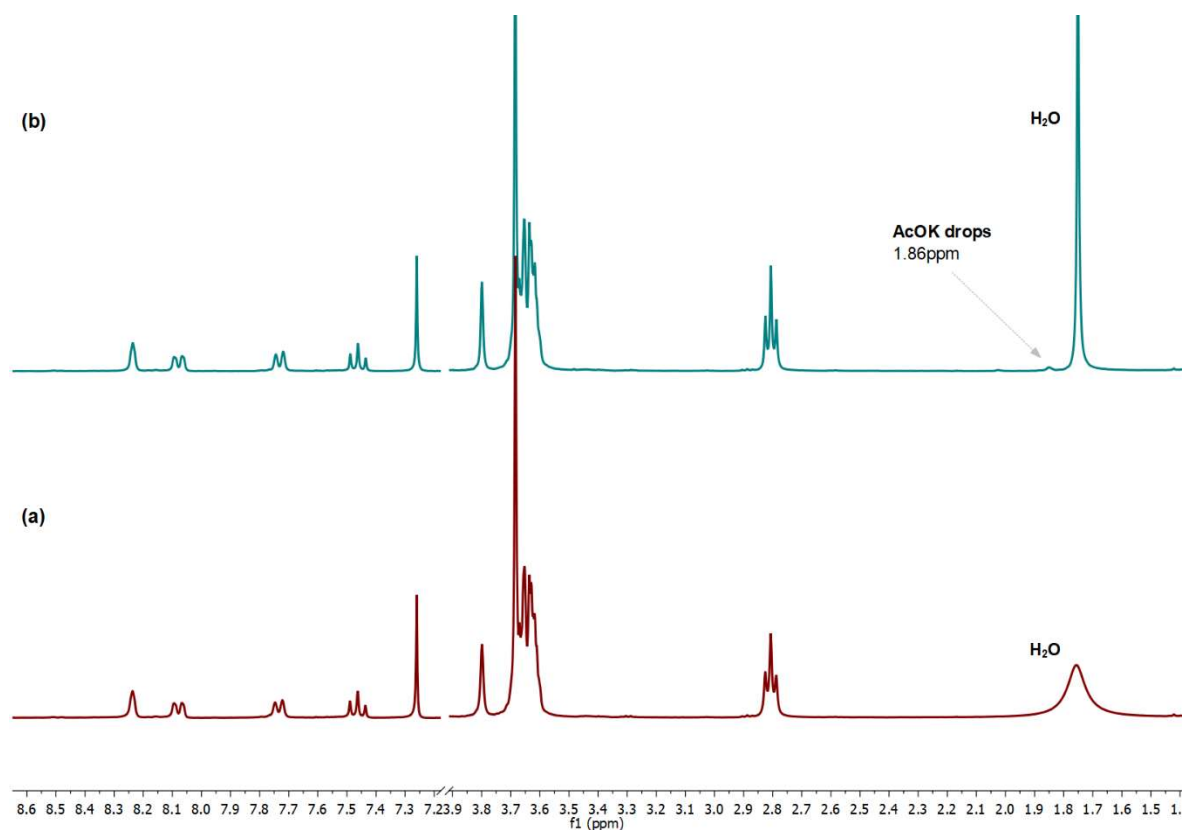

**Figure 49.** Partial  $^1\text{H}$  NMR spectrum stack of Receptor **3**; (a) Receptor **3** solution after being washed with deionized water ( $C_{\text{receptor}}=2.5 \times 10^{-2}\text{M}$ ); (c) Receptor **3** solution after extraction with 100 eq AcOK aqua solution ( $C_{\text{AcOK}}=2.5\text{M}$ )

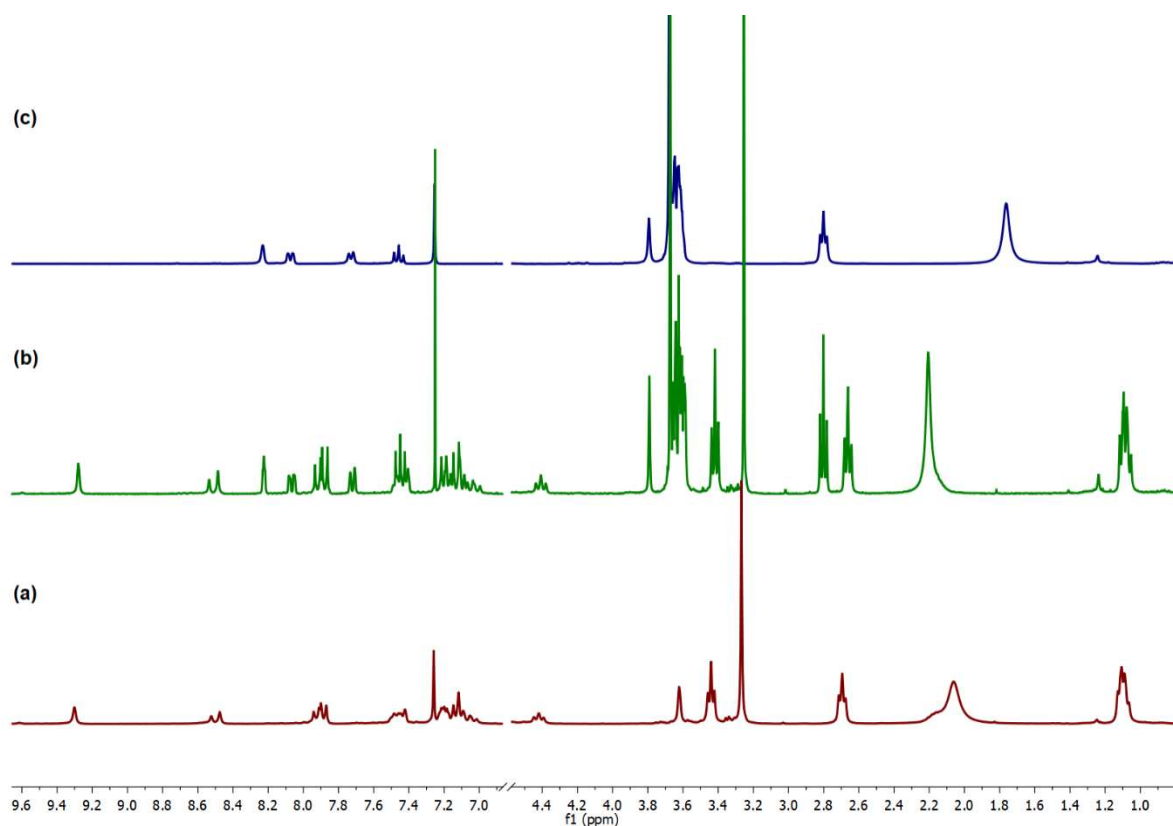

**Figure 50.** Partial  $^1\text{H}$  NMR (a) Receptor **2** after being washed with deionized water ( $C_{\text{receptor}}=2.5 \times 10^{-2}\text{M}$ ); (b) Equimolar mixture of Receptors **2** and **3** after being washed with deionized water ( $C_{\text{receptor}}=2.5 \times 10^{-2}\text{M}$ ); (c) Receptor **3** after being washed with deionized water ( $C_{\text{receptor}}=2.5 \times 10^{-2}\text{M}$ )

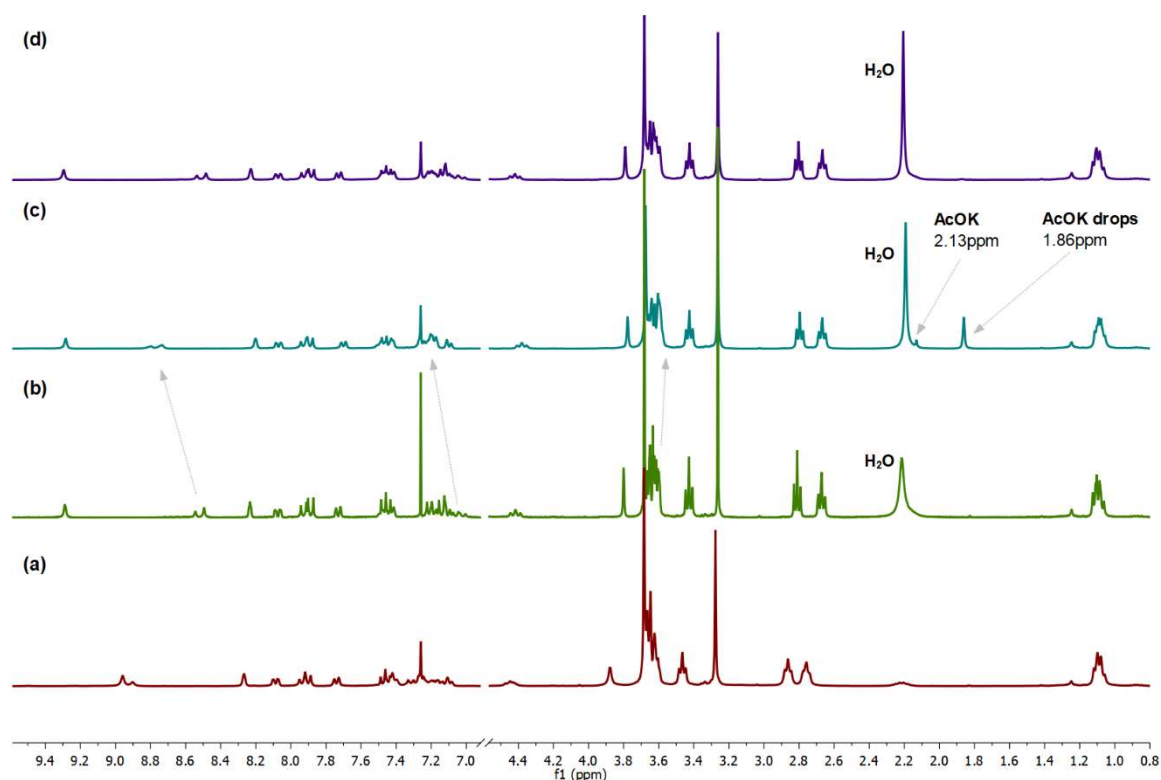

**Figure 51.** Partial  $^1\text{H}$  NMR spectrum stack of extraction experiment steps. (a) Equimolar mixture of Receptors **2** and **3** dissolved in 'dry'  $\text{CDCl}_3$  ( $C_{\text{receptors}}=2.5 \times 10^{-2}\text{M}$ ); (b) Equimolar mixture of Receptors **2** and **3** solution being washed with deionized water; (c) Equimolar mixture of Receptors **2** and **3** solution after extraction with 50 eq AcOK aqua solution ( $C_{\text{AcOK}}=1.25\text{M}$ ); (d) Equimolar mixture of Receptors **2** and **3** solution after 'back extraction'- washed with deionized water.

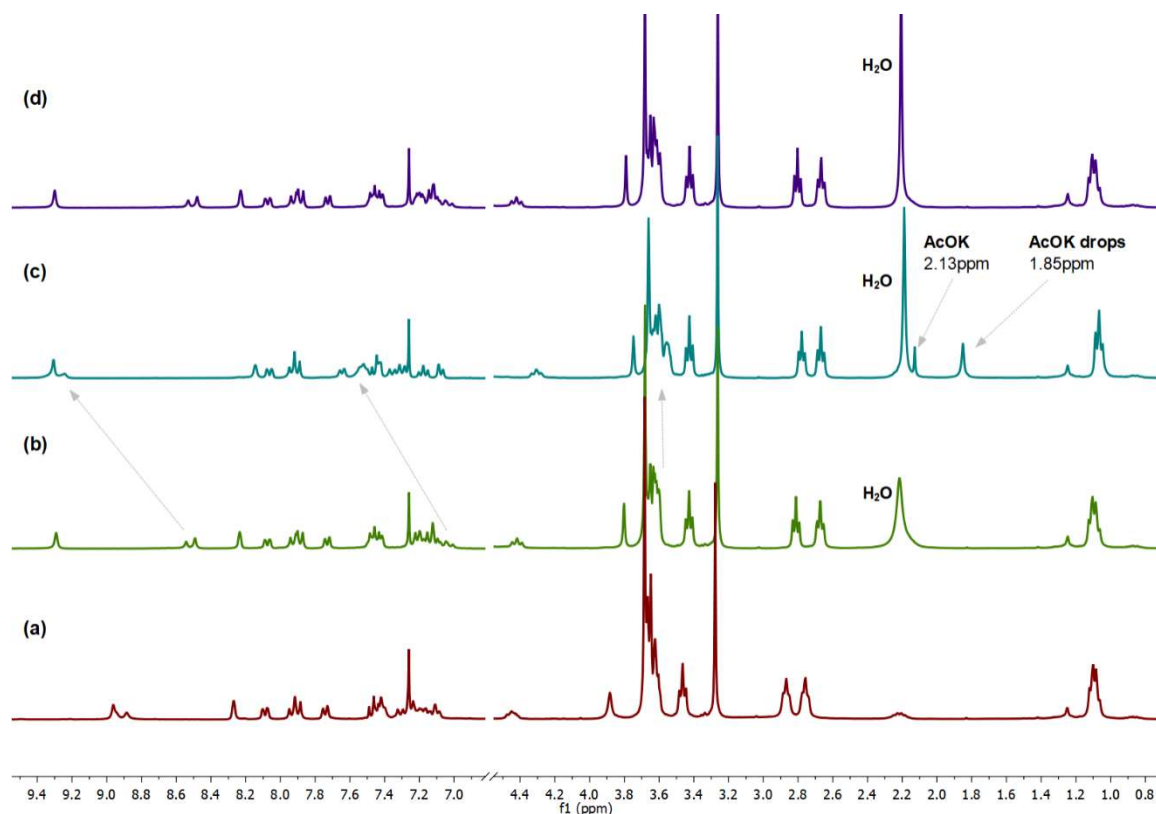

**Figure 52.** Partial  $^1\text{H}$  NMR spectrum stack of extraction experiment steps. (a) Equimolar mixture of Receptors **2** and **3** dissolved in 'dry'  $\text{CDCl}_3$  ( $C_{\text{receptors}}=2.5 \times 10^{-2}\text{M}$ ); (b) Equimolar mixture of Receptors **2** and **3** solution after being washed with deionized

water; (c) Equimolar mixture of Receptors **2** and **3** solution after extraction with 100 eq AcOK aqua solution ( $C_{\text{AcOK}}=2.5\text{M}$ ); (d) Equimolar mixture of Receptors **2** and **3** solution after 'back extraction'- washed with deionized water.

| $C_{\text{AcOK}}[\text{mol/dm}^3]$ | $C_{\text{receptor}}[\text{mol/dm}^3]$ | Equivalent <sup>(a)</sup> | Extraction efficiency <sup>(b)</sup> |
|------------------------------------|----------------------------------------|---------------------------|--------------------------------------|
| 1.25                               | 0.025                                  | 50                        | 12 %                                 |
| 2.5                                | 0.025                                  | 100                       | 27 %                                 |

**Figure 53.** The results of  $^1\text{H}$  NMR extraction experiments for equimolar mixture of receptors **2** and **3**; <sup>(a)</sup>units of moles of salt vs. units of moles of receptor in 0.5 ml of solutions; <sup>(b)</sup> Extraction efficiency calculated from the integral value of acetate methyl group. Assuming that 100% efficiency is the value of the integral 3.

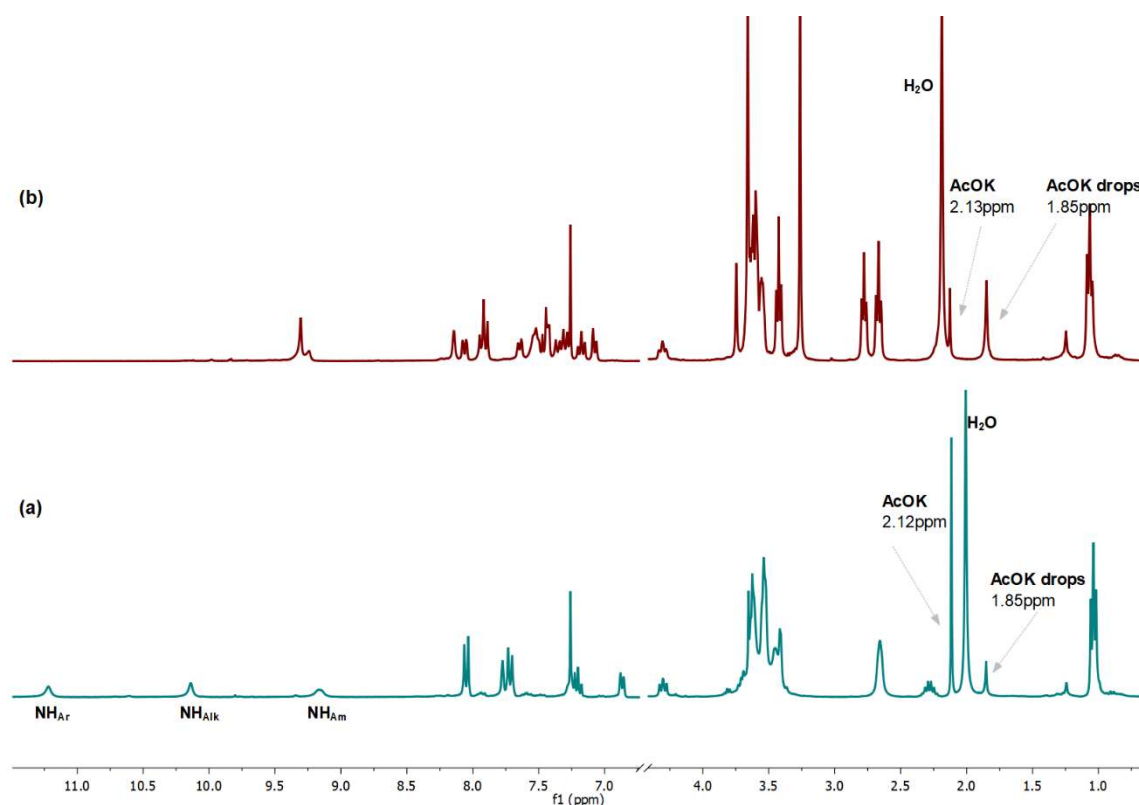

**Figure 54.** Partial  $^1\text{H}$  NMR spectrum stack of extraction experiment steps.  $C_{\text{receptors}}=2.5 \times 10^{-2}\text{M}$  (a) Receptor **1** solution after extraction with 100 eq AcOK aqua solution ( $C_{\text{AcOK}}=2.5\text{M}$ ) (b) Equimolar mixture of Receptors **2** and **3** solution after extraction with 100 eq AcOK aqua solution ( $C_{\text{AcOK}}=2.5\text{M}$ ); Extraction efficiency (a) ~100%; (b) ~27%

## 6. Extraction of potassium ibuprofenate

Extraction experiment of potassium ibuprofenate was performed using the same technique as in case of model potassium acetate. All extraction steps were carried out in NMR tube without any further refinement on the sample.

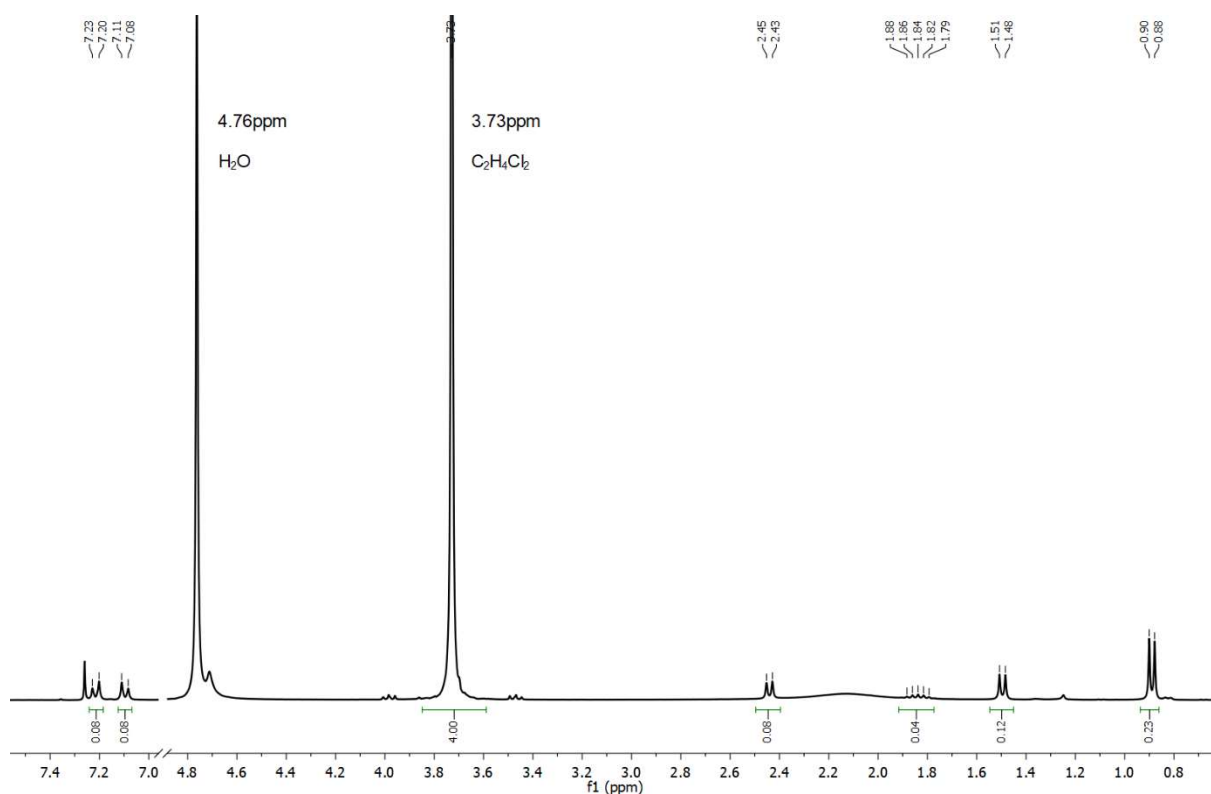

**Figure 55.** Liquid-Liquid extraction of potassium ibuprofenate aqueous solution  $C=0.2$  M which corresponds to 8.1 eq. when the receptor solution is present with  $\text{CDCl}_3$ . Salt concentration was measured based on addition of 10  $\mu\text{L}$  of 1,2-dichloroethane as internal standard and it was  $4.82 \times 10^{-6}$ . The efficiency of this process was 3.83 % based on internal standard addition.

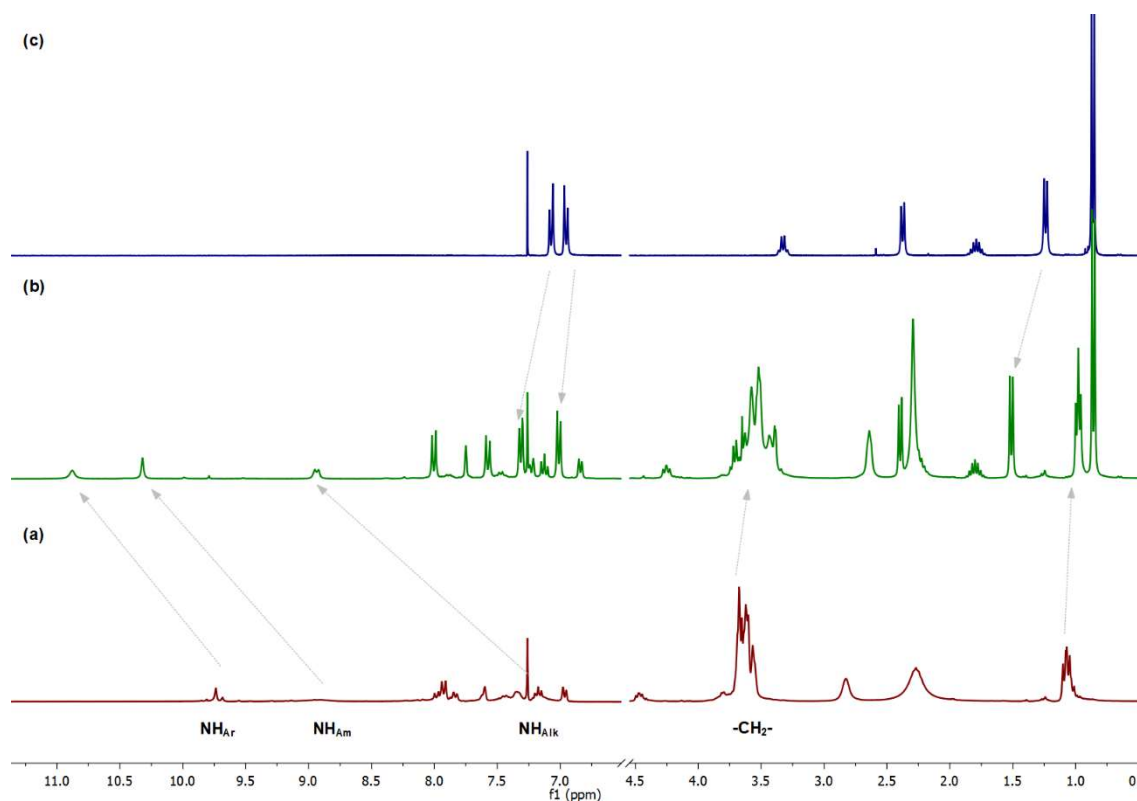

**Figure 56.**  $^1\text{H}$  NMR spectrum stack of extraction experiment steps: (a) Receptor **1** solution after being washed with deionized water  $C_{\text{rec}}=2.5 \times 10^{-2}$ ; (b) Receptor **1** solution after extraction with 3.8 eq potassium ibuprofenate aqueous solution ( $C_{\text{salt}}=9.6 \times 10^{-2} \text{M}$ ); (c)  $\text{CDCl}_3$  solution of potassium ibuprofenate extracted from solid to chloroform phase (SLE), after 30 minutes. Extraction efficiency estimated as 100%.

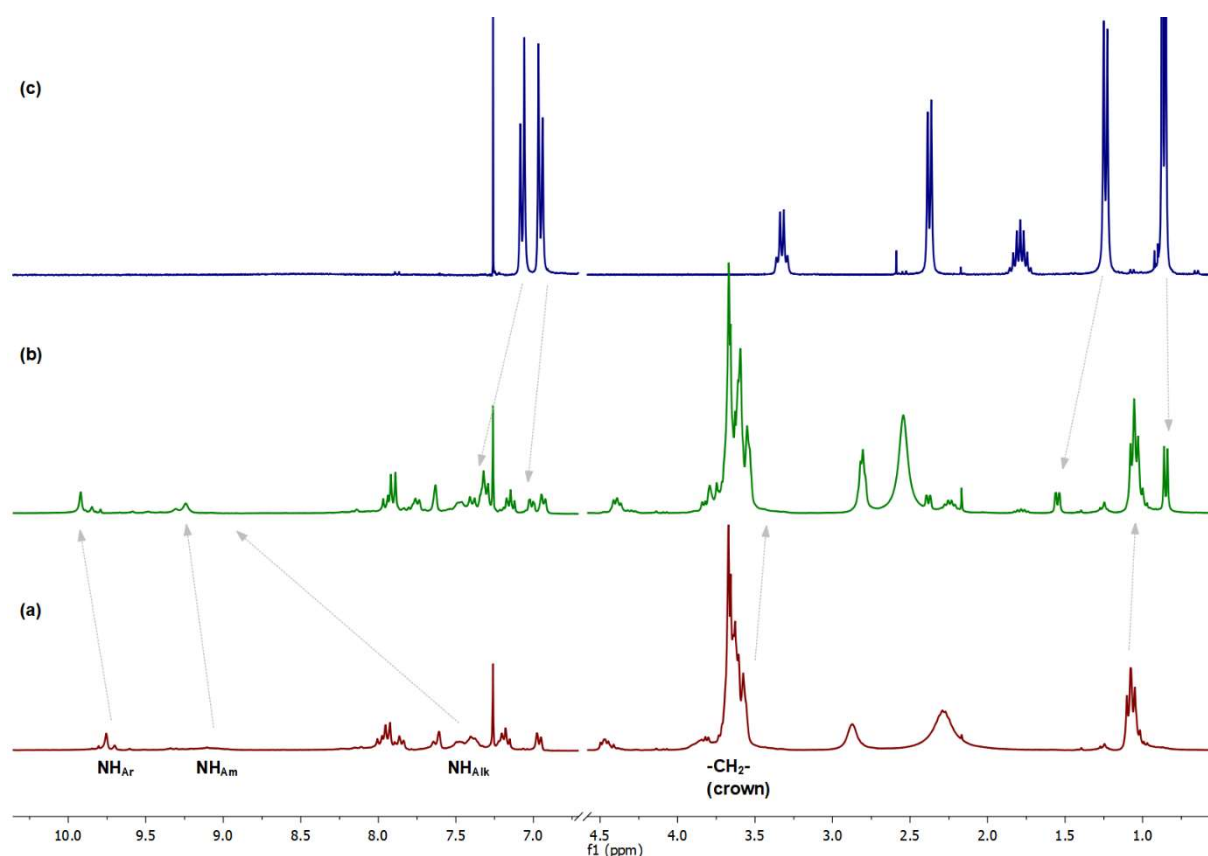

**Figure 57.**  $^1\text{H}$  NMR spectrum stack of extraction experiment steps: (a) Receptor **1** solution after being washed with deionized water  $C_{\text{rec}}=2.5 \times 10^{-2}$ ; (b) Receptor **1** solution after extraction with 0.25 eq potassium ibuprofenate aqueous solution ( $C_{\text{salt}}=6.2 \times 10^{-3}\text{M}$ ); (c)  $\text{CDCl}_3$  solution of potassium ibuprofenate extracted from solid to chloroform phase (SLE), after 30 minutes.

## 7. 2D NMR ROESY experiment

2D NMR ROESY experiment was performed on 500 MHz Varian spectrometer, at 298K in  $\text{CDCl}_3$  solution. The receptor **1** solution  $C_{\text{receptor}}=3 \times 10^{-2}\text{M}$  in chloroform was extracted with 100 eq AcOK aqueous solution  $C_{\text{AcOK}}=3\text{M}$ . Then after phase separation organic phase was retract through hydrophobic filter and placed in NMR tube. Filtration was performed to dispose water drops on the NMR tube's walls.

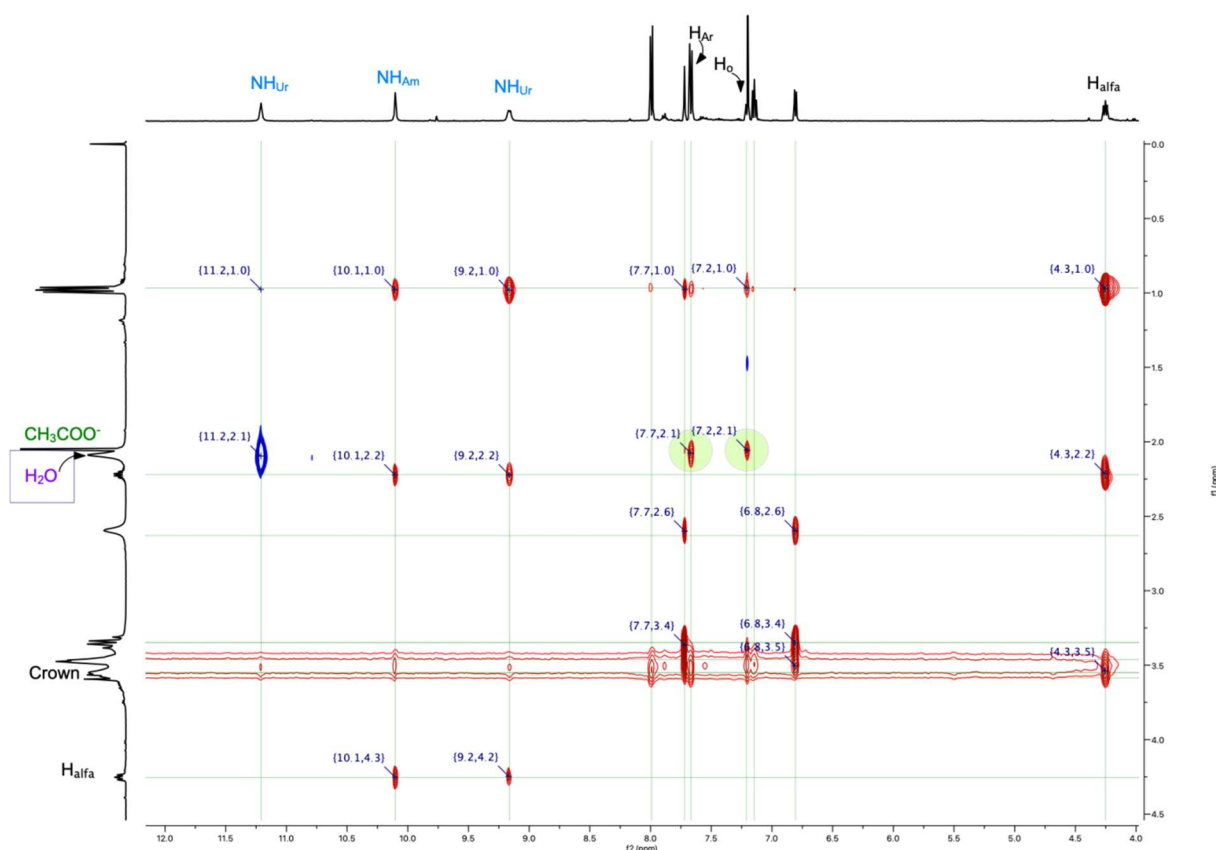

The results of 2D ROESY experiment have shown cross-peaks between protons  $H_{Ar}$  with potassium acetate methyl group and with benzyle linker's proton  $H_O$ . The presence of those cross-peaks confirmed close distance between the receptor and the salt in the ternary complex. The most important conclusion is that this tight fit is maintained in 'wet' chloroform solution in concentration similar to LLE experiments.

## 8. The calculated structure of $1 \bullet KCl$ complex

Theoretical calculations for  $1 \bullet AcOK$  were performed in Gaussian 09 (Revision D.01).<sup>3</sup> The initial (starting point) geometry has been established based on 2D ROESY NMR results and was obtained by preoptimization of  $1 \bullet AcOK$  with universal force field and steepest descent algorithm implemented in Avogadro 1.2.<sup>4</sup> Geometry optimization and frequency calculation were done with aim of the  $\omega B97xD$  hybrid functional and 6-311G(2df,2p) basis set.<sup>5</sup> Ultrafine integration grid method was also applied. Stationary point was found with positive values of all calculated frequencies. Evaluated energy for obtained final geometry is -7844085.62766536 kJ/mol and atomic coordinates are provided below.

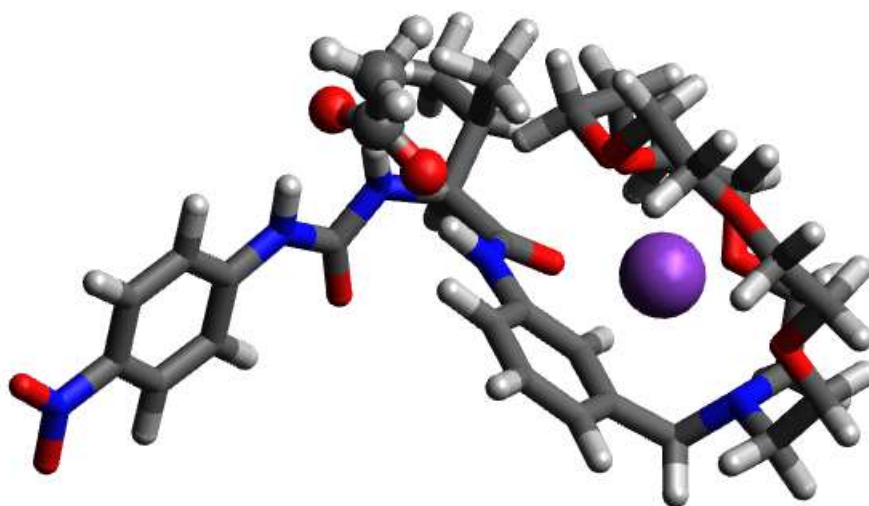

**Figure 58.** The structure of receptor **1** in complex with AcOK

| Atoms                                                              | Distance [ $\text{\AA}$ ]              |
|--------------------------------------------------------------------|----------------------------------------|
| (Rec H <sub>Ar</sub> )H59---H95(CH <sub>3</sub> COO <sup>-</sup> ) | 4.896                                  |
| (Rec H <sub>Ar</sub> )H59---H96(CH <sub>3</sub> COO <sup>-</sup> ) | 4.174                                  |
| (Rec H <sub>Ar</sub> )H59---H97(CH <sub>3</sub> COO <sup>-</sup> ) | 5.461                                  |
| (Rec H <sub>Ar</sub> )H56---H95(CH <sub>3</sub> COO <sup>-</sup> ) | 7.798                                  |
| (Rec H <sub>Ar</sub> )H56---H96(CH <sub>3</sub> COO <sup>-</sup> ) | 7.620                                  |
| (Rec H <sub>Ar</sub> )H56---H97(CH <sub>3</sub> COO <sup>-</sup> ) | 8.204                                  |
| (Rec H <sub>O</sub> )H83---H95(CH <sub>3</sub> COO <sup>-</sup> )  | 3.986                                  |
| (Rec H <sub>O</sub> )H83---H96(CH <sub>3</sub> COO <sup>-</sup> )  | 5.126                                  |
| (Rec H <sub>O</sub> )H83---H97(CH <sub>3</sub> COO <sup>-</sup> )  | 4.946                                  |
| (CH <sub>3</sub> COO <sup>-</sup> )O93 Y-shape---K <sup>+</sup>    | 7.134                                  |
| (CH <sub>3</sub> COO <sup>-</sup> )O92 Y-shape---K <sup>+</sup>    | 4.964                                  |
| N9--O93                                                            | 2.842; $\angle_{\text{NHO}} 160^\circ$ |
| N9—O92                                                             | 3.635; $\angle_{\text{NHO}} 120^\circ$ |
| N3—O93                                                             | 2.891; $\angle_{\text{NHO}} 155^\circ$ |
| N3—O92                                                             | 3.268; $\angle_{\text{NHO}} 120^\circ$ |
| N43—O92                                                            | 2.771; $\angle_{\text{NHO}} 150^\circ$ |
| N43—O93                                                            | 4.192; $\angle_{\text{NHO}} 160^\circ$ |
| K98--O24                                                           | 2.774                                  |
| K98--O23                                                           | 2.761                                  |
| K98--O27                                                           | 2.767                                  |
| K98--O32                                                           | 2.870                                  |
| K98--O33                                                           | 2.874                                  |
| Ar <sub>ring</sub> $\pi$ -- K98                                    | 2.871                                  |

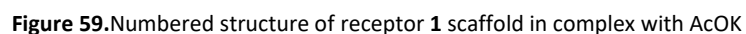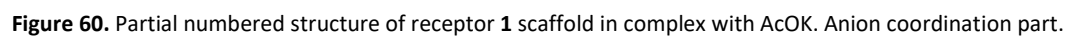

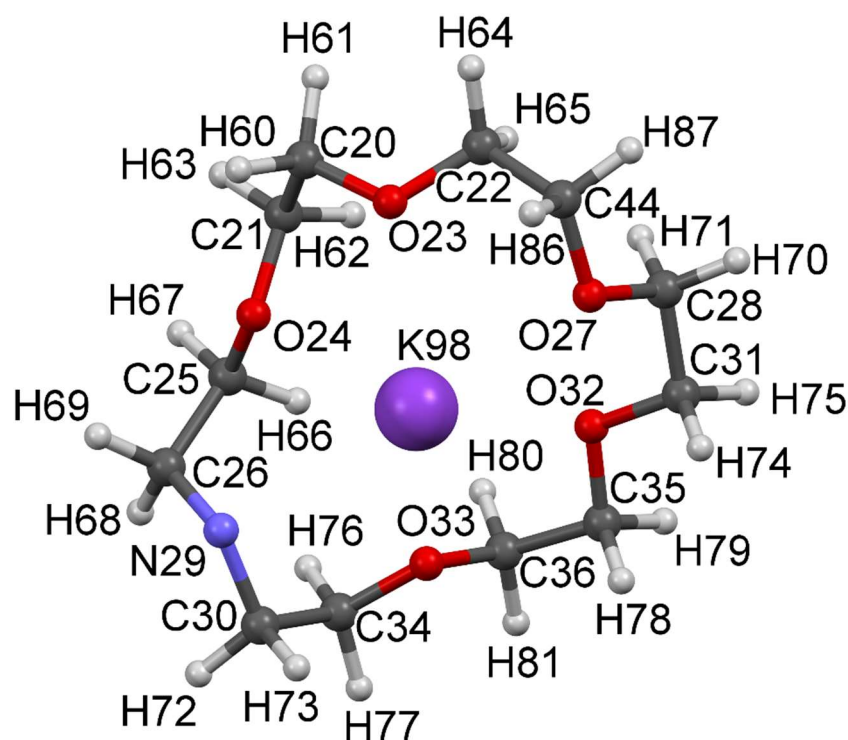

**Figure 61.** Partial numbered structure of receptor 1 scaffold in complex with AcOK. Cation coordination part.

| Number | Label | X       | Y       | Z       |    |     |         |         |         |
|--------|-------|---------|---------|---------|----|-----|---------|---------|---------|
|        |       |         |         |         | 15 | C15 | -6.9915 | -1.3130 | 1.4690  |
| 1      | C1    | -1.8850 | 2.4576  | -1.9775 | 16 | C16 | -6.0442 | -0.3452 | 1.2334  |
| 2      | C2    | -0.7644 | 1.4063  | -2.0254 | 17 | N17 | -8.4215 | -3.1371 | 0.6610  |
| 3      | N3    | -2.9432 | 2.1658  | -1.0547 | 18 | O18 | -8.8443 | -3.2643 | 1.7950  |
| 4      | C4    | -1.2870 | 3.8517  | -1.7265 | 19 | O19 | -8.7815 | -3.8193 | -0.2794 |
| 5      | C5    | -0.7551 | 3.9929  | -0.3000 | 20 | C20 | 2.5242  | 2.5462  | -0.9766 |
| 6      | C6    | -2.2956 | 4.9472  | -2.0526 | 21 | C21 | 3.9209  | 2.1207  | -1.3671 |
| 7      | O7    | 0.0193  | 1.4131  | -2.9600 | 22 | C22 | 2.1605  | 2.6512  | 1.3844  |
| 8      | C8    | -3.8173 | 1.1465  | -1.3143 | 23 | O23 | 2.0976  | 1.8875  | 0.2008  |
| 9      | N9    | -4.5688 | 0.8364  | -0.1952 | 24 | O24 | 3.8602  | 0.7607  | -1.7306 |
| 10     | O10   | -3.9033 | 0.5972  | -2.3948 | 25 | C25 | 5.0714  | 0.2019  | -2.1716 |
| 11     | C11   | -5.5136 | -0.1543 | -0.0523 | 26 | C26 | 4.7560  | -1.0803 | -2.9261 |
| 12     | C12   | -5.9657 | -0.9635 | -1.1026 | 27 | O27 | 2.4369  | 0.7047  | 2.8163  |
| 13     | C13   | -6.9158 | -1.9337 | -0.8607 | 28 | C28 | 3.4874  | 1.0114  | 3.6945  |
| 14     | C14   | -7.4222 | -2.1060 | 0.4164  | 29 | N29 | 4.0679  | -2.0810 | -2.1252 |
|        |       |         |         |         | 30 | C30 | 4.9084  | -3.1690 | -1.6656 |
|        |       |         |         |         | 31 | C31 | 4.3525  | -0.2069 | 3.8627  |

|    |     |         |         |         |    |     |         |         |         |
|----|-----|---------|---------|---------|----|-----|---------|---------|---------|
| 32 | O32 | 4.9844  | -0.4950 | 2.6339  | 66 | H66 | 5.7333  | 0.0136  | -1.3150 |
| 33 | O33 | 5.4940  | -2.2189 | 0.4498  | 67 | H67 | 5.5895  | 0.8932  | -2.8478 |
| 34 | C34 | 6.0293  | -2.7507 | -0.7412 | 68 | H68 | 5.6916  | -1.4768 | -3.3433 |
| 35 | C35 | 5.8543  | -1.5963 | 2.7152  | 69 | H69 | 4.1289  | -0.8026 | -3.7733 |
| 36 | C36 | 6.4860  | -1.8373 | 1.3713  | 70 | H70 | 3.0932  | 1.3088  | 4.6740  |
| 37 | C37 | 1.3792  | -3.0654 | -0.6134 | 71 | H71 | 4.1010  | 1.8361  | 3.3127  |
| 38 | C38 | 0.4594  | -2.6583 | 0.3476  | 72 | H72 | 5.3636  | -3.7197 | -2.5067 |
| 39 | C39 | 1.6502  | -2.2338 | -1.6935 | 73 | H73 | 4.2826  | -3.8760 | -1.1201 |
| 40 | C40 | -0.2006 | -1.4498 | 0.2276  | 74 | H74 | 3.7388  | -1.0580 | 4.1811  |
| 41 | C41 | 0.9692  | -1.0306 | -1.8368 | 75 | H75 | 5.1029  | -0.0149 | 4.6389  |
| 42 | C42 | 0.0258  | -0.6319 | -0.8881 | 76 | H76 | 6.6907  | -2.0176 | -1.2195 |
| 43 | N43 | -0.7311 | 0.5276  | -0.9907 | 77 | H77 | 6.6392  | -3.6332 | -0.5124 |
| 44 | C44 | 1.5978  | 1.8102  | 2.5064  | 78 | H78 | 5.3064  | -2.4937 | 3.0283  |
| 45 | C45 | 2.7726  | -2.5488 | -2.6498 | 79 | H79 | 6.6447  | -1.4063 | 3.4520  |
| 46 | H46 | -2.2954 | 2.4317  | -2.9876 | 80 | H80 | 6.9988  | -0.9303 | 1.0269  |
| 47 | H47 | -2.8647 | 2.4485  | -0.0805 | 81 | H81 | 7.2357  | -2.6306 | 1.4777  |
| 48 | H48 | -0.4471 | 3.9318  | -2.4203 | 82 | H82 | 0.2451  | -3.2950 | 1.1962  |
| 49 | H49 | -1.5671 | 4.0613  | 0.4269  | 83 | H83 | -0.9063 | -1.1204 | 0.9784  |
| 50 | H50 | -0.1554 | 4.9003  | -0.2064 | 84 | H84 | 1.1720  | -0.3834 | -2.6747 |
| 51 | H51 | -0.1418 | 3.1358  | -0.0216 | 85 | H85 | -1.2796 | 0.7559  | -0.1523 |
| 52 | H52 | -3.1767 | 4.8620  | -1.4157 | 86 | H86 | 0.6271  | 1.4062  | 2.2073  |
| 53 | H53 | -2.6232 | 4.8846  | -3.0909 | 87 | H87 | 1.4522  | 2.4305  | 3.3971  |
| 54 | H54 | -1.8581 | 5.9341  | -1.8933 | 88 | H88 | 2.8150  | -3.6246 | -2.8435 |
| 55 | H55 | -4.2855 | 1.3330  | 0.6511  | 89 | H89 | 2.5725  | -2.0677 | -3.6066 |
| 56 | H56 | -5.5586 | -0.8195 | -2.0892 | 90 | H90 | 1.8820  | -4.0200 | -0.5171 |
| 57 | H57 | -7.2732 | -2.5662 | -1.6591 | 91 | C91 | -2.2353 | 1.7971  | 2.2790  |
| 58 | H58 | -7.4037 | -1.4668 | 2.4545  | 92 | O92 | -1.4364 | 1.0752  | 1.6328  |
| 59 | H59 | -5.6956 | 0.2828  | 2.0432  | 93 | O93 | -3.2532 | 2.3566  | 1.8136  |
| 60 | H60 | 1.8336  | 2.2644  | -1.7727 | 94 | C94 | -1.9101 | 2.0521  | 3.7466  |
| 61 | H61 | 2.4841  | 3.6317  | -0.8481 | 95 | H95 | -1.3886 | 1.2018  | 4.1826  |
| 62 | H62 | 4.6239  | 2.2664  | -0.5341 | 96 | H96 | -2.8133 | 2.2777  | 4.3084  |
| 63 | H63 | 4.2675  | 2.7259  | -2.2134 | 97 | H97 | -1.2527 | 2.9227  | 3.8070  |
| 64 | H64 | 1.5550  | 3.5580  | 1.2848  | 98 | K98 | 3.0683  | -0.6794 | 0.5046  |
| 65 | H65 | 3.1943  | 2.9608  | 1.5906  |    |     |         |         |         |

## 9. References

1. M. Zakrzewski, D. Załubiniak and P. Piątek, *Dalton Trans.*, 2018, **47**, 323–330
2. (a) P. Thordarson, *Chem. Soc. Rev.*, 2011, **40**, 1305–1323 (b) D. Brynn Hibbert and P. Thordarson, *Chemical Communications*, 2016, **52**, 12792–12805.
3. M. J. Frisch, G. W. Trucks, H. B. Schlegel, G. E. Scuseria, M. A. Robb, J. R. Cheeseman, G. Scalmani, V. Barone, G. A. Petersson, H. Nakatsuji, X. Li, M. Caricato, A. Marenich, J. Bloino, B. G. Janesko, R. Gomperts, B. Mennucci, H. P. Hratchian, J. V. Ortiz, A. F. Izmaylov, J. L. Sonnenberg, D. Williams-Young, F. Ding, F. Lipparini, F. Egidi, J. Goings, B. Peng, A. Petrone, T. Henderson, D. Ranasinghe, V. G. Zakrzewski, J. Gao, N. Rega, G. Zheng, W. Liang, M. Hada, M. Ehara, K. Toyota, R. Fukuda, J. Hasegawa, M. Ishida, T. Nakajima, Y. Honda, O. Kitao, H. Nakai, T. Vreven, K. Throssell, J. A. Montgomery, Jr., J. E. Peralta, F. Ogliaro, M. Bearpark, J. J. Heyd, E. Brothers, K. N. Kudin, V. N. Staroverov, T. Keith, R. Kobayashi, J. Normand, K. Raghavachari, A. Rendell, J. C. Burant, S. S. Iyengar, J. Tomasi, M. Cossi, J. M. Millam, M. Klene, C. Adamo, R. Cammi, J. W. Ochterski, R. L. Martin, K. Morokuma, O. Farkas, J. B. Foresman, and D. J. Fox, Gaussian 09, Revision A.02, Gaussian, Inc., Wallingford CT, 2016.
4. M. D. Hanwell, D. E. Curtis, D. C. Lonie, T. Vandermeersch, E. Zurek and G. R. Hutchison, *Journal of Cheminformatics* 2012, **4**:17
5. (a) J. Chaia, M. Head-Gordon, *Phys. Chem. Chem. Phys.*, 2008, **10**, 6615–6620 (b) A. D. McLean and G. S. Chandler, *J. Chem. Phys.*, 1980, **72**, 5639
